# Supplementary material for: Reduced Levels of ATP Synthase Subunit ATP5F1A Correlate with Earlier‐Onset Prostate Cancer
Source: Hindawi journal article supplement (doi:10.1155/2018/1347174), 2018-01-01
Supplement: f1 [file 1347174.f1.pdf]

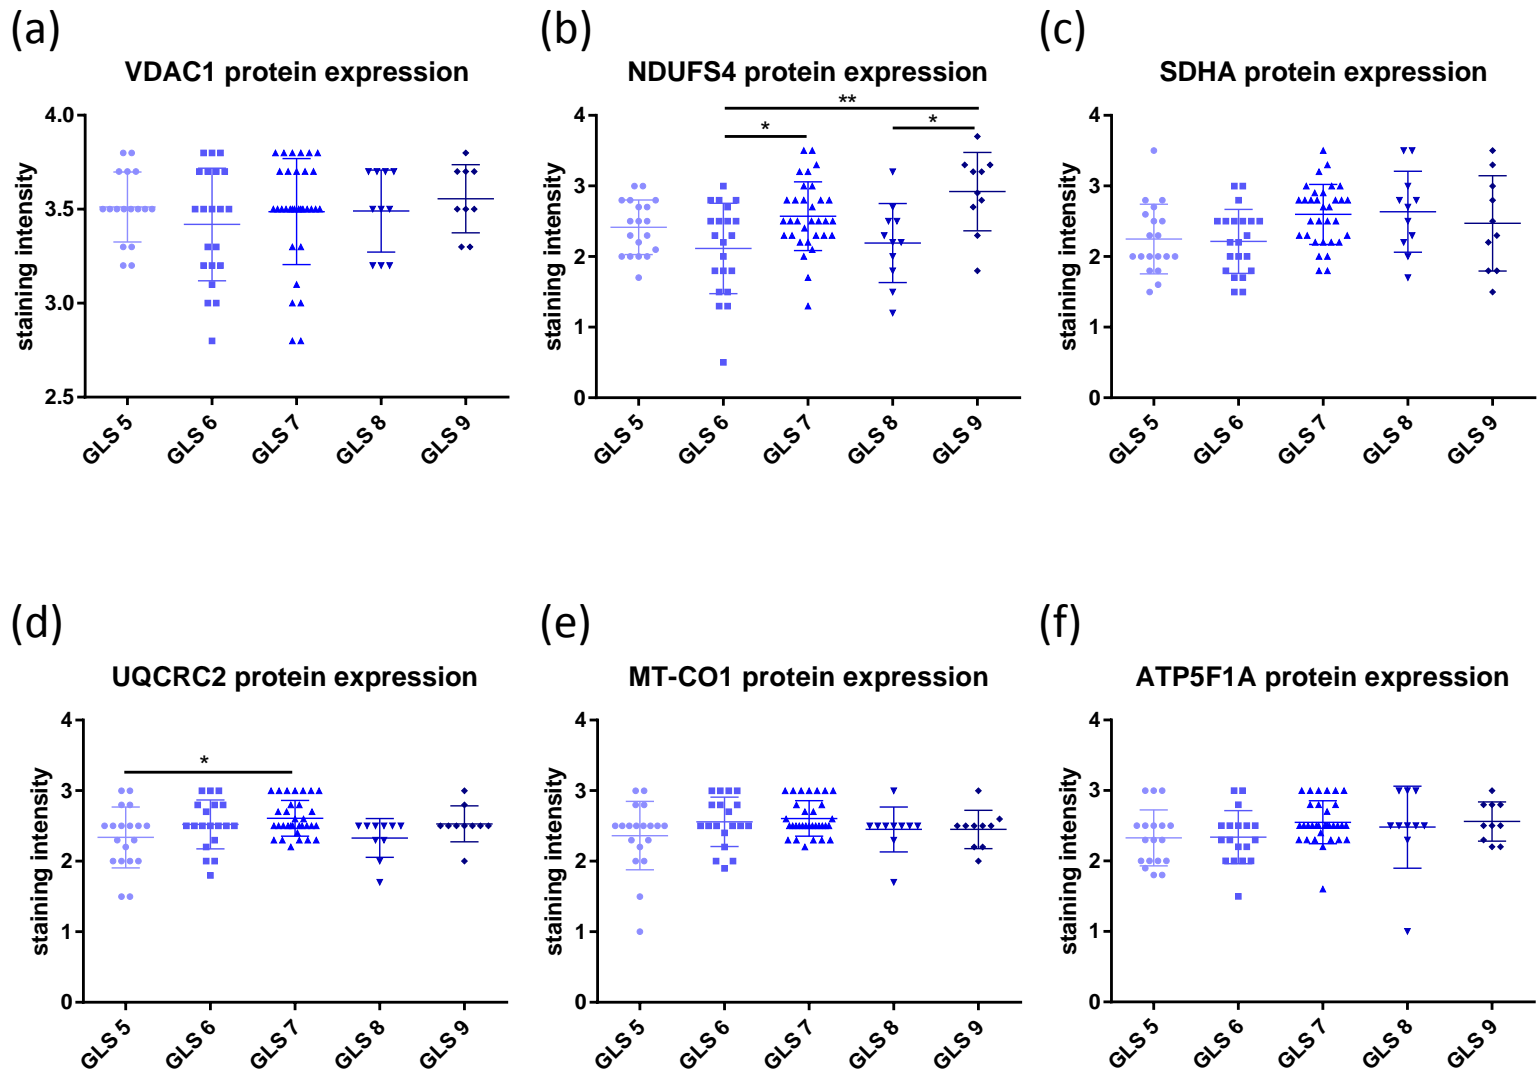

**Supplementary figure 1: OXPHOS complex expression in prostate carcinomas of different Gleason scores.** (a) VDAC1, (b) NDUF54, (c) SDHA, (d) UQCRC2, (e) MT-CO1, (f) ATP5F1A. The intensities of the stainings are given as median  $\pm$  SD. \*\*\* $p < 0.001$ , \*\* $p > 0.01$ , \* $p > 0.05$ .

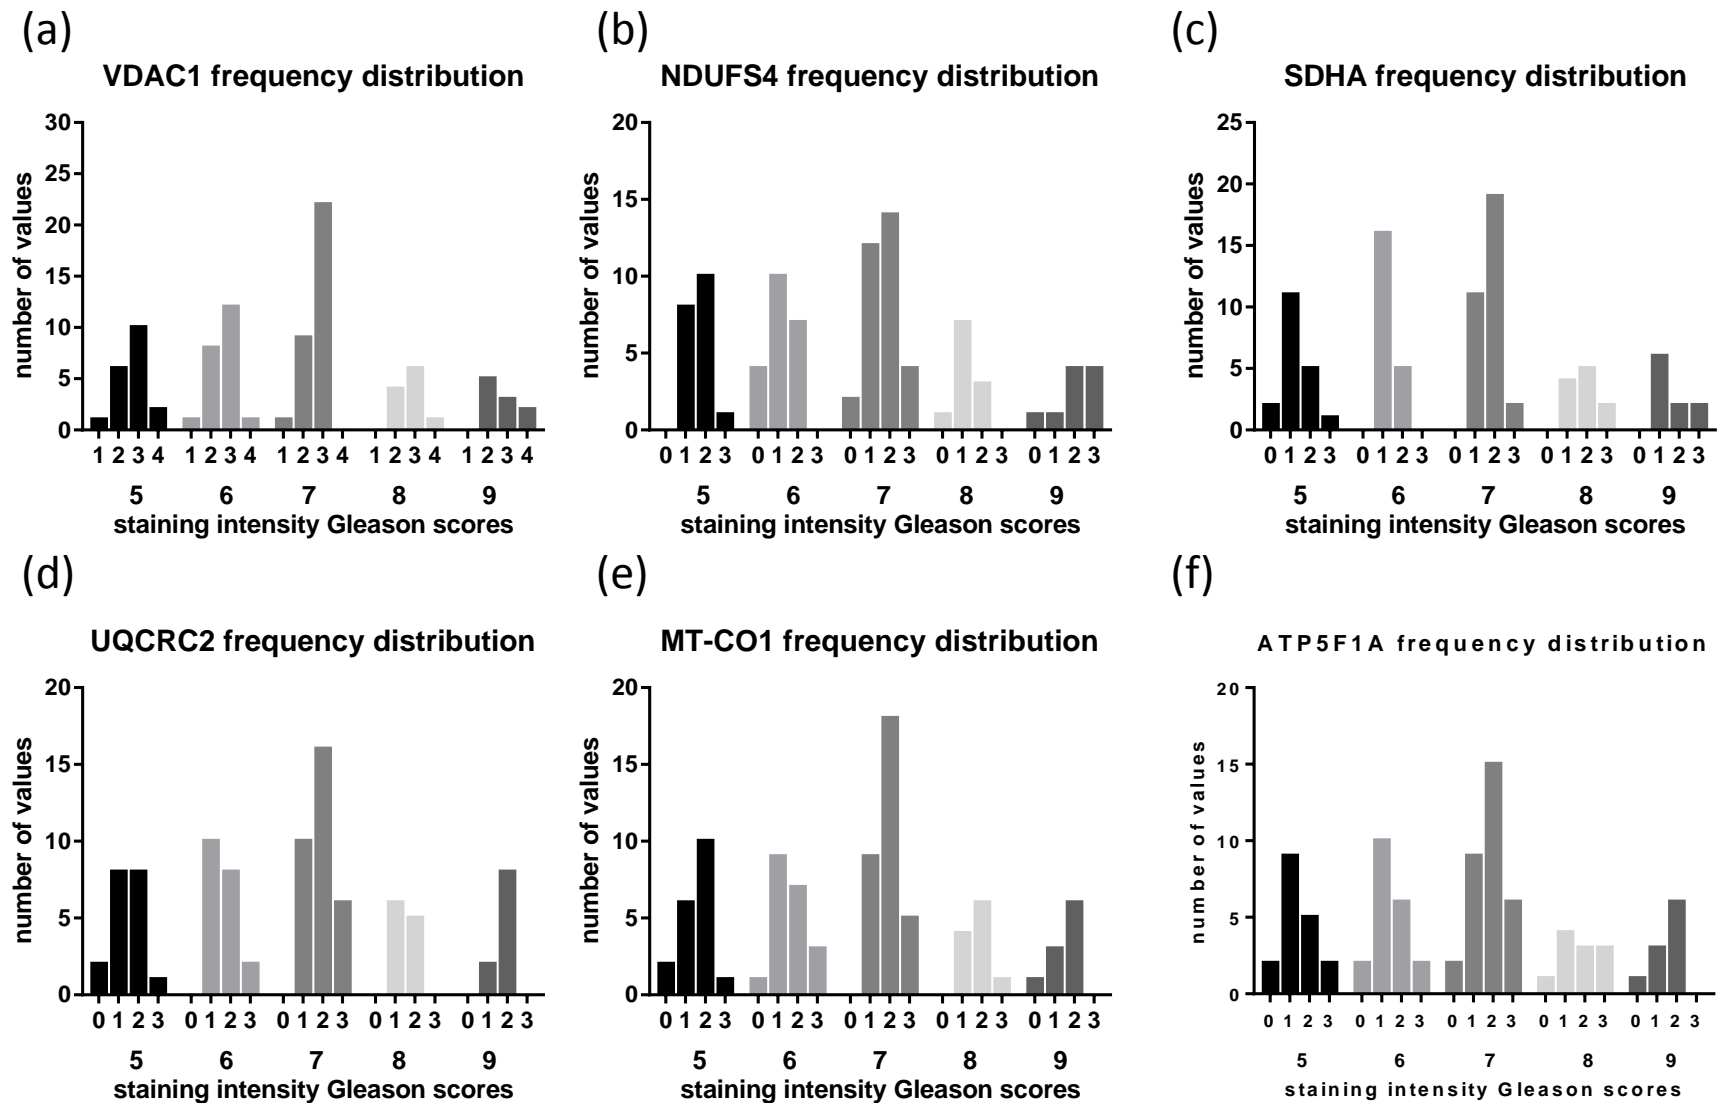

**Supplementary figure 2: Frequency distribution of the lowest staining intensities found in prostate carcinoma tissue punches of different Gleason scores. (a) VDAC1, (b) NDUFS4, (c) SDHA, (d) UQCRC2, (e) MT-CO1, (f) ATP5F1A. The frequencies are given in percent. The staining intensities are: 0 = no staining, 1 = weak staining, 2 = moderate staining, 3 = strong staining, 4 = very strong staining.**

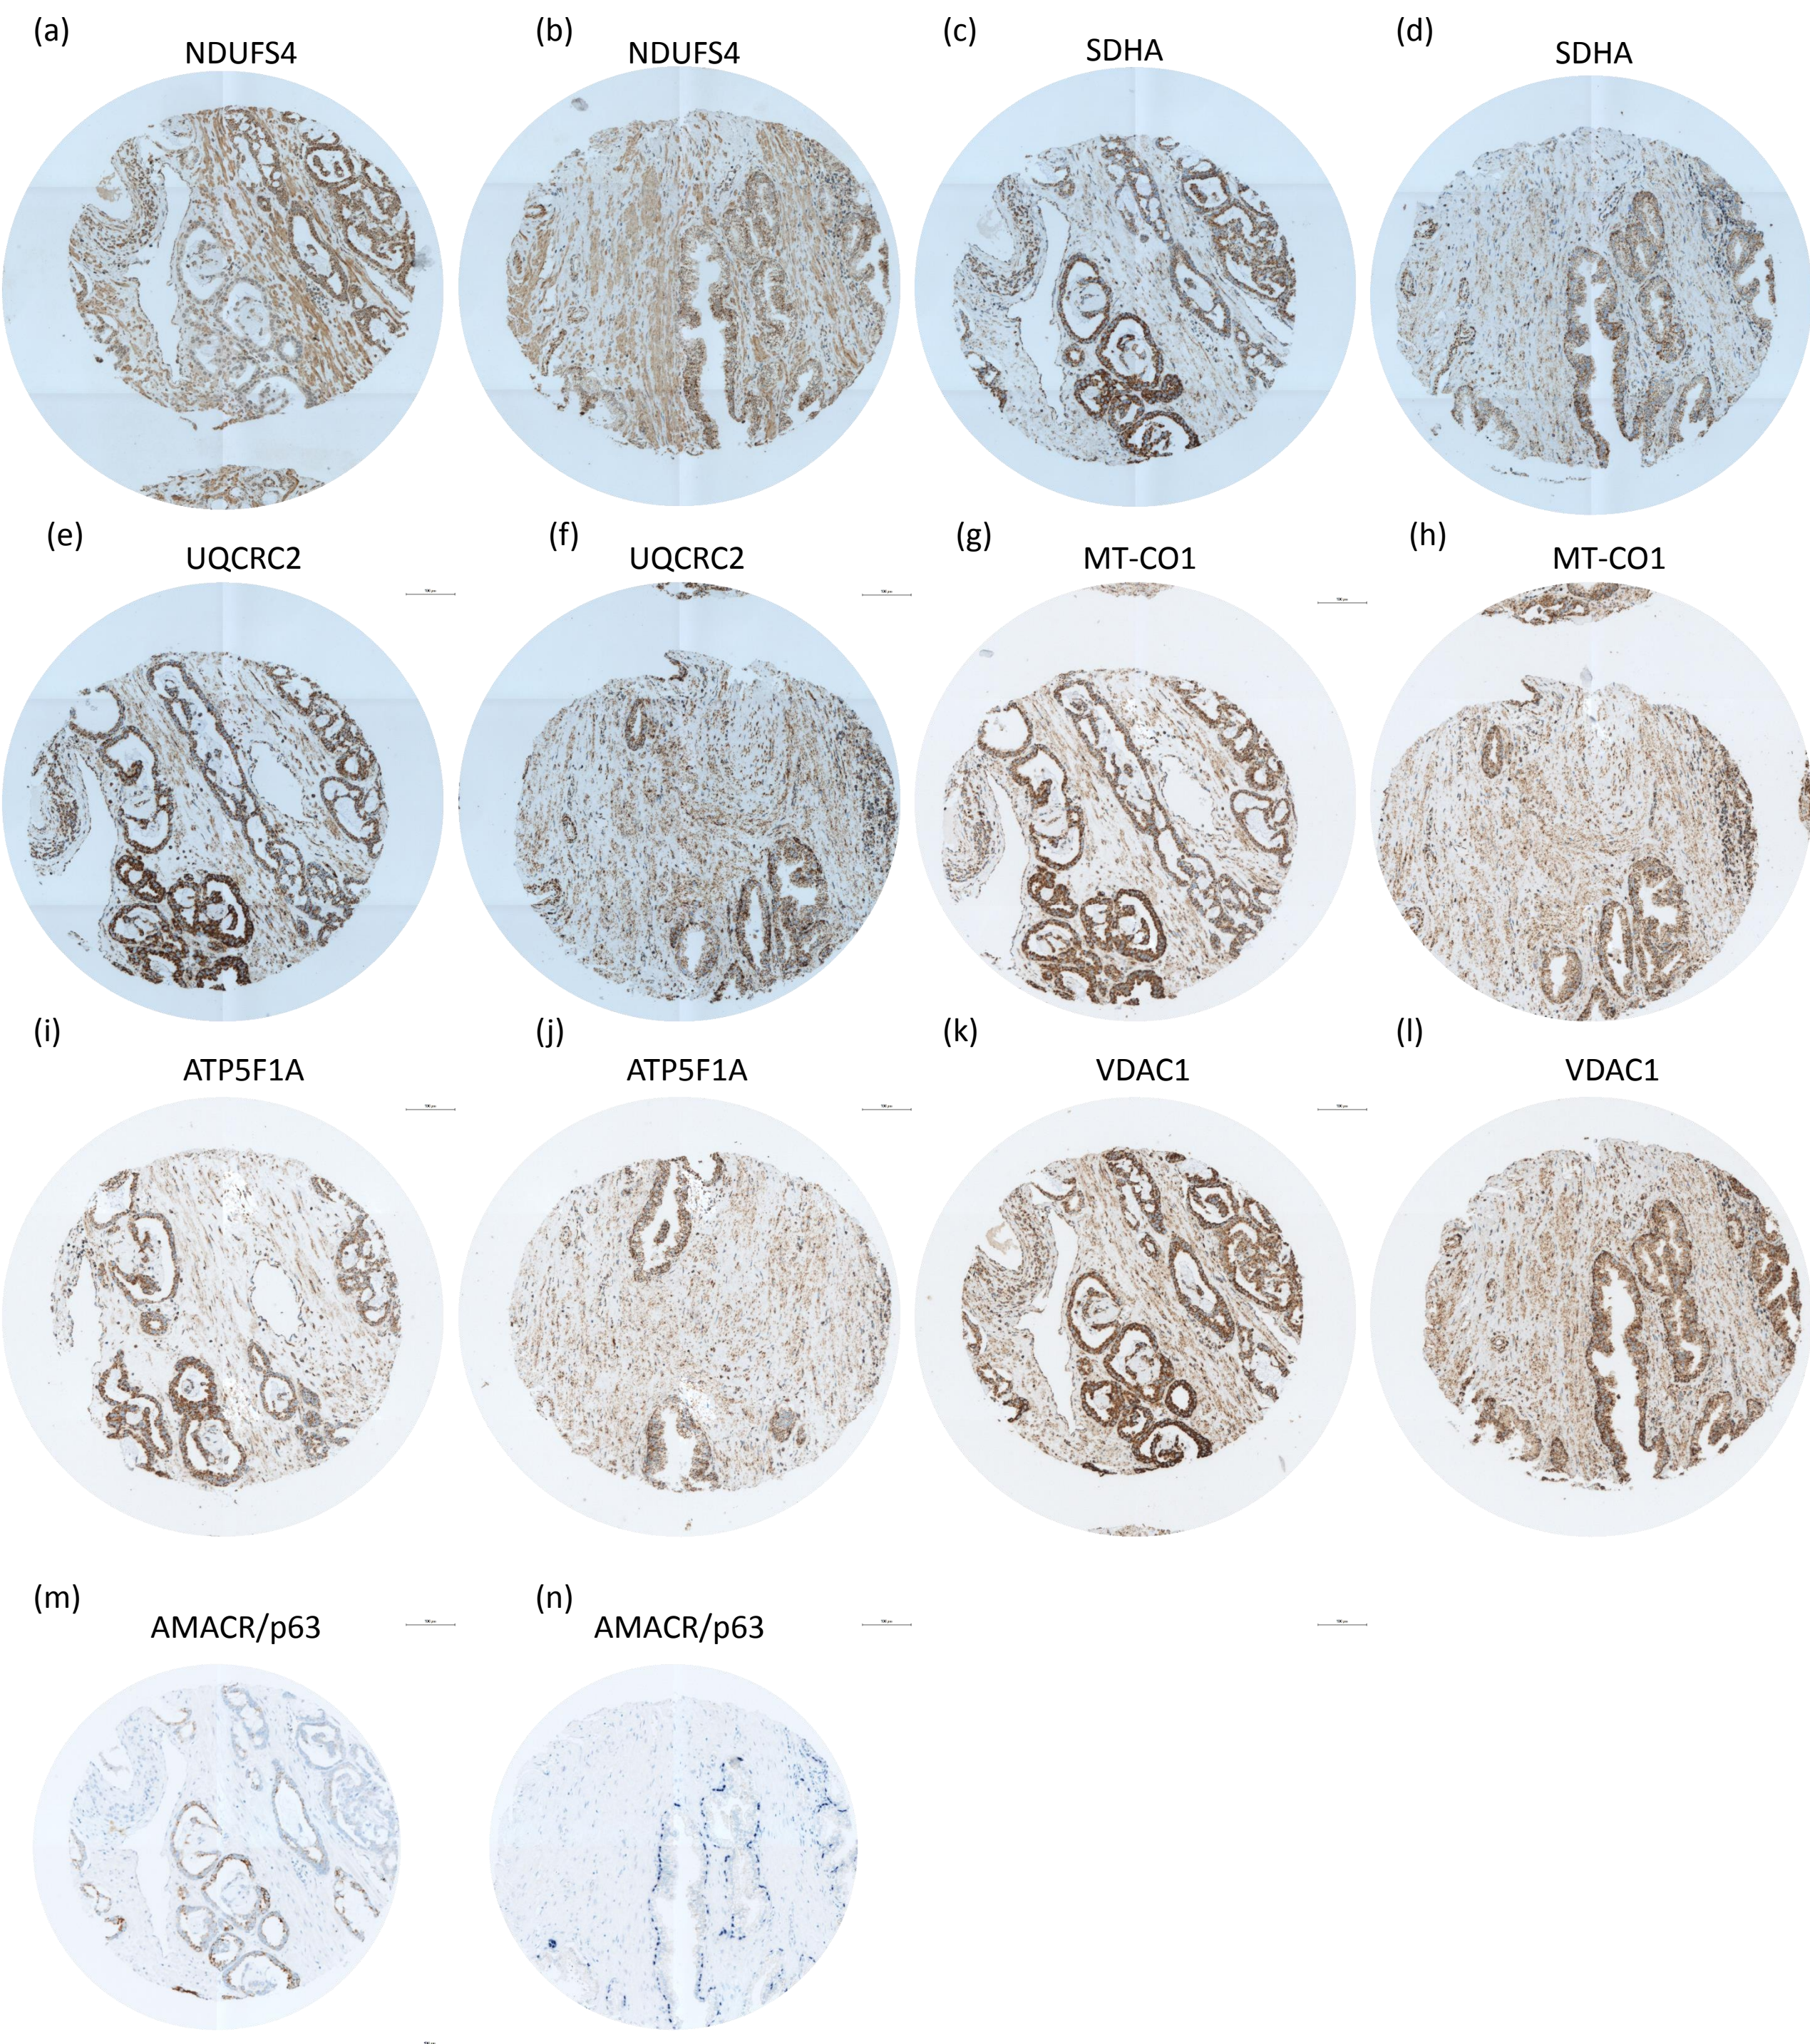

**Supplementary figure 3: Staining of the OXPHOS complexes, VDAC1 and AMACR/p63 in a prostate carcinoma Gleason score 7 and the adjacent benign prostate tissue.** (a, b) NDUFS4, (c, d) SDHA, (e, f) UQCRC2, (g, h) MT-CO1, (i, j) ATP5F1A, (k, l) VDAC1, (m, n) AMACR/p63. (a, c, e, g, i, k) carcinoma; (b, d, f, h, j, l, n) benign prostate tissue. The punches are 0.6 mm in diameter. The AMACR/p63 staining was used to visualize the carcinoma cells in brown and the benign prostate tissue in blue.

**Supplementary table 1A: Staining intensities**

| Tumor    | Punch | VDAC1    |          |          |          | NDUFS4   |          |          |          | SDHA     |          |          |          | UQCRC2   |          |          |          | MT-CO1   |          |          |          | ATP5F1A  |          |          |          |
|----------|-------|----------|----------|----------|----------|----------|----------|----------|----------|----------|----------|----------|----------|----------|----------|----------|----------|----------|----------|----------|----------|----------|----------|----------|----------|
|          |       | CA       |          | BE       |          | CA       |          | BE       |          | CA       |          | BE       |          | CA       |          | BE       |          | CA       |          | BE       |          | CA       |          | BE       |          |
|          |       | Low/High | Low/High | Low/High | Low/High | Low/High | Low/High | Low/High | Low/High | Low/High | Low/High | Low/High | Low/High | Low/High | Low/High | Low/High | Low/High | Low/High | Low/High | Low/High | Low/High | Low/High | Low/High | Low/High | Low/High |
| 9932197  | B1    | 3        |          |          |          | 2        | 3        | 2        | 2        | 1        | 2        | 0        | 1        | 2        | 3        | 2        | 3        | 2        | 3        |          |          |          |          |          |          |
| 9932197  | B2    |          |          | 3        | 4        |          |          | 3        | 3        |          |          | 1        | 3        |          |          | 3        |          |          | 2        | 3        |          |          | 2        | 3        |          |
| 9935954  | B3    | 3        |          |          |          | 2        | 3        |          |          | 1        | 2        |          |          | 1        | 2        |          |          | 2        | 3        |          |          | 2        | 3        |          |          |
| 9935954  | B4    | 3        | 4        |          |          | 2        | 3        |          |          | 1        | 2        |          |          | 1        | 3        |          |          | 2        | 3        |          |          | 2        | 3        |          |          |
| 9935954  | B5    | 2        | 3        |          |          |          |          | 1        | 2        |          |          | 1        | 2        |          |          |          |          | 1        | 3        |          |          |          |          | 2        | 3        |
| 9935954  | B6    |          |          | 3        |          |          |          | 1        | 2        |          |          | 1        | 3        |          |          | 1        | 2        | 2        | 3        |          |          | 2        | 3        |          |          |
| 10338726 | B7    | 3        | 4        |          |          | 0        | 2        |          |          | 1        | 4        |          |          | 1        | 3        |          |          | 1        | 3        |          |          |          |          |          |          |
| 10338726 | B8    |          |          | 3        | 4        |          |          | 1        | 3        |          |          | 1        | 3        |          |          | 2        | 3        |          |          | 2        | 3        |          |          | 2        | 3        |
| 10343434 | B9    | 3        | 4        |          |          | 2        | 3        |          |          | 2        | 3        |          |          | 1        | 3        |          |          | 2        | 3        |          |          | 2        | 3        |          |          |
| 10343434 | B10   | 3        | 4        |          |          | 2        | 3        |          |          | 2        | 3        |          |          | 3        | 3        |          |          | 2        | 3        |          |          | 2        | 3        |          |          |
| 10343434 | B11   | 3        | 4        |          |          | 2        | 3        | 2        | 3        | 3        | 3        | 2        | 3        | 3        | 3        | 2        | 3        | 2        | 3        | 2        | 3        | 2        | 3        |          |          |
| 10343434 | B12   |          |          | 3        | 4        |          |          | 1        | 3        |          |          | 1        | 3        |          |          | 2        | 3        |          |          | 1        | 3        |          |          | 1        | 2        |
| 10631521 | B13   | 3        | 4        |          |          |          |          | 2        | 3        |          |          | 2        | 3        |          |          | 2        | 3        |          |          | 2        | 3        |          |          |          |          |
| 10631521 | B14   |          |          | 3        | 4        |          |          | 1        | 3        |          |          | 2        | 3        |          |          | 3        | 3        |          |          | 2        | 3        |          |          | 2        | 3        |
| 10637255 | B15   | 3        | 4        |          |          | 2        | 3        |          |          | 2        | 2        |          |          | 2        | 3        |          |          | 2        | 3        |          |          | 2        | 3        |          |          |
| 10637255 | B16   | 3        | 4        |          |          | 3        | 3        |          |          | 2        | 2        |          |          | 2        | 3        |          |          | 2        | 3        |          |          | 2        | 3        |          |          |
| 10637255 | B17   | 3        | 4        |          |          | 2        | 3        |          |          | 1        | 2        |          |          | 2        | 3        |          |          | 2        | 3        |          |          | 2        | 3        |          |          |
| 10637255 | B18   |          |          | 2        | 3        |          |          | 2        | 3        |          |          | 1        | 2        | 3        | 3        | 2        | 3        | 2        | 3        |          |          |          |          | 2        | 3        |
| 9916972  | C1    | 3        | 4        |          |          | 3        | 3        |          |          | 1        | 3        |          |          | 2        | 3        |          |          | 2        | 3        |          |          |          |          |          |          |
| 9916972  | C2    | 3        | 4        |          |          | 3        | 4        |          |          | 1        | 3        |          |          | 2        | 3        |          |          | 2        | 3        |          |          | 3        | 3        |          |          |
| 9916972  | C3    | 3        | 4        |          |          | 2        | 3        |          |          | 1        | 3        |          |          | 1        | 3        |          |          | 2        | 3        |          |          | 1        | 3        |          |          |
| 9916972  | C4    |          |          | 3        | 4        |          |          | 2        | 3        |          |          | 2        | 2        |          |          | 2        | 3        |          |          |          |          |          |          | 2        | 3        |
| 9932197  | C5    | 3        | 4        |          |          |          |          | 1        | 3        |          |          | 2        | 2        |          |          | 2        | 3        |          |          |          |          |          |          | 2        | 3        |
| 9932197  | C6    | 3        | 4        |          |          | 2        | 3        |          |          | 2        | 3        |          |          | 2        | 3        | 2        | 3        | 2        | 3        |          |          | 2        | 3        | 2        | 3        |
| 10325091 | C7    | 3        | 4        |          |          | 2        | 3        | 2        | 3        | 3        | 3        | 1        | 3        | 2        | 3        | 2        | 3        | 2        | 3        |          |          |          |          |          |          |
| 10325091 | C8    | 3        | 4        |          |          | 1        | 3        |          |          | 3        | 3        |          |          | 2        | 3        |          |          | 2        | 3        |          |          | 3        | 3        |          |          |
| 10325091 | C9    | 3        | 4        |          |          | 1        | 3        |          |          | 2        | 3        |          |          | 1        | 3        |          |          | 2        | 3        |          |          | 3        | 3        |          |          |
| 10325091 | C10   |          |          | 3        |          |          |          | 2        | 3        |          |          | 2        | 2        |          |          | 3        | 3        |          |          | 2        | 3        |          |          | 2        | 3        |
| 10338726 | C11   | 3        |          |          |          |          |          |          |          |          |          |          |          |          |          |          |          | 3        | 3        | 1        | 2        |          |          | 1        | 3        |
| 10338726 | C12   | 3        | 4        |          |          | 1        | 3        | 2        | 3        | 2        | 3        | 1        | 2        | 2        | 3        | 2        | 3        | 0        | 1        | 2        | 3        | 1        | 3        |          |          |
| 10630526 | C13   | 3        | 4        |          |          | 2        | 3        |          |          | 3        | 4        |          |          | 2        | 3        |          |          | 2        | 3        |          |          | 2        | 3        |          |          |
| 10630526 | C14   | 3        | 4        |          |          | 3        | 3        |          |          | 3        | 3        |          |          | 2        | 3        |          |          | 2        | 3        |          |          | 2        | 3        |          |          |
| 10630526 | C15   | 3        | 4        |          |          | 2        | 4        | 3        | 3        | 3        | 4        | 3        | 3        | 2        | 3        |          |          | 1        | 3        |          |          | 2        | 3        |          |          |
| 10630526 | C16   |          |          | 3        | 4        |          |          | 2        | 3        |          |          | 2        | 3        | 2        | 3        | 2        | 3        | 2        | 3        |          |          |          |          | 2        | 3        |
| 10631521 | C17   | 3        | 4        |          |          | 2        | 3        |          |          | 2        | 3        |          |          | 2        | 3        |          |          | 2        | 3        |          |          | 2        | 3        |          |          |
| 10631521 | C18   | 2        | 4        |          |          | 3        | 3        | 3        | 3        | 2        | 3        | 1        | 3        |          |          | 3        |          | 2        | 3        |          |          | 2        | 3        |          |          |
| 10904082 | C19   | 3        | 4        | 2        |          | 2        | 3        | 2        | 3        | 3        | 4        | 1        | 2        | 2        | 3        |          |          | 2        | 3        |          |          | 1        | 3        |          |          |
| 10904082 | C20   | 2        | 4        |          |          | 2        | 3        |          |          | 3        | 4        |          |          | 2        | 3        |          |          | 2        | 3        |          |          | 2        | 3        |          |          |
| 10904082 | C21   | 2        | 4        |          |          | 1        | 3        | 3        | 3        | 3        | 4        | 1        | 3        | 2        | 3        | 2        | 3        | 2        | 3        |          |          | 2        | 3        |          |          |
| 10904082 | C22   |          |          | 2        | 3        |          |          | 2        | 3        |          |          | 2        | 3        |          |          | 2        | 3        |          |          | 2        | 3        |          |          | 2        | 3        |
| 9908111  | D1    | 3        | 4        |          |          |          |          | 1        | 2        |          |          | 0        | 1        |          |          | 2        | 3        |          |          | 2        | 3        |          |          | 2        | 3        |

|          |     |   |   |   |   |   |   |   |   |   |   |   |   |   |   |   |   |   |   |   |   |   |   |   |   |
|----------|-----|---|---|---|---|---|---|---|---|---|---|---|---|---|---|---|---|---|---|---|---|---|---|---|---|
| 9908111  | D2  |   |   | 2 | 3 |   |   | 1 | 2 |   |   | 0 | 1 |   |   | 2 | 2 |   |   | 2 | 2 |   |   | 0 | 1 |
| 9909768  | D3  | 3 | 4 |   |   | 1 | 3 |   |   | 1 | 3 |   |   | 3 | 3 |   |   | 3 | 3 |   |   | 2 | 3 |   |   |
| 9909768  | D4  | 4 |   |   |   | 3 | 4 | 2 | 2 | 3 | 4 | 2 | 3 | 3 |   |   | 3 | 3 |   |   | 2 | 3 |   |   |   |
| 9909768  | D5  | 4 |   |   |   | 1 | 2 | 3 | 3 | 3 | 4 | 1 | 2 |   |   |   | 2 | 3 |   |   | 2 | 3 | 2 | 2 |   |
| 9909768  | D6  |   |   | 3 | 4 |   |   | 1 | 2 |   |   | 1 | 2 | 2 | 3 |   |   | 2 | 3 |   |   | 1 | 2 |   |   |
| 10310392 | D7  | 4 |   |   |   | 1 | 3 |   |   | 2 | 3 |   |   | 3 | 3 |   |   | 3 | 3 |   |   |   |   |   |   |
| 10310392 | D8  |   |   | 3 |   |   |   | 2 | 3 |   |   | 1 | 2 |   |   | 3 | 3 |   |   | 3 | 3 |   |   | 2 | 2 |
| 10311955 | D9  | 3 | 4 |   |   | 2 | 3 |   |   | 3 | 3 |   |   | 3 | 3 |   |   | 3 | 3 |   |   | 2 | 3 |   |   |
| 10311955 | D10 | 3 | 4 |   |   | 2 | 3 |   |   | 3 | 3 |   |   | 3 | 3 |   |   | 3 | 3 |   |   | 2 | 3 |   |   |
| 10311955 | D11 | 3 | 4 |   |   | 2 | 3 |   |   | 3 | 3 |   |   |   |   | 2 | 3 |   |   | 2 | 3 | 2 | 3 |   |   |
| 10311955 | D12 |   |   | 2 | 3 | 2 | 2 | 2 | 3 | 2 | 3 | 2 | 3 |   |   | 2 | 3 |   |   | 2 | 3 |   |   | 1 | 3 |
| 10625132 | D13 | 3 | 4 |   |   | 3 | 3 | 3 | 3 | 3 | 3 | 2 | 3 | 2 | 3 |   |   | 2 | 3 |   |   | 2 | 3 | 2 | 3 |
| 10625132 | D14 |   |   | 3 | 4 |   |   | 2 | 3 |   |   | 1 | 3 |   |   | 2 | 3 |   |   | 2 | 3 |   |   | 2 | 3 |
| 10627970 | D15 | 3 |   |   |   | 3 | 4 |   |   | 3 | 3 |   |   | 2 | 3 |   |   | 2 | 3 |   |   | 2 | 3 |   |   |
| 10627970 | D16 | 3 |   |   |   | 3 | 3 |   |   | 2 | 3 |   |   | 2 | 3 |   |   | 2 | 3 |   |   | 2 | 3 |   |   |
| 10627970 | D17 | 2 | 3 |   |   |   |   | 2 | 3 |   |   | 1 | 2 |   |   | 2 | 3 |   |   | 2 | 3 |   |   | 1 | 2 |
| 10627970 | D18 |   |   | 2 | 4 |   |   | 2 | 3 |   |   | 1 | 3 |   |   | 2 | 3 |   |   | 2 | 3 |   |   | 2 | 2 |
| 10817500 | D19 | 4 |   |   |   | 4 | 4 |   |   | 4 | 4 |   |   | 2 | 3 |   |   | 2 | 3 |   |   | 3 | 3 |   |   |
| 10817500 | D20 |   |   | 3 | 4 |   |   | 3 | 3 |   |   | 1 | 3 |   |   | 2 | 3 |   |   | 2 | 3 |   |   | 2 | 3 |
| 10821594 | D21 | 4 |   |   |   | 2 | 3 |   |   | 1 | 4 |   |   | 1 | 3 |   |   | 1 | 3 |   |   | 3 | 3 |   |   |
| 10821594 | D22 | 3 | 4 |   |   | 2 | 3 | 2 | 3 | 2 | 4 | 0 | 1 | 1 | 3 |   |   | 1 | 3 |   |   | 1 | 3 |   |   |
| 10821594 | D23 | 2 | 4 |   |   | 2 | 4 | 2 | 3 | 2 | 4 | 0 | 1 | 1 | 3 |   |   | 1 | 3 |   |   | 2 | 3 |   |   |
| 10821594 | D24 |   |   | 3 |   |   |   | 2 | 3 |   |   | 1 | 2 |   |   | 1 | 3 |   |   | 1 | 3 |   |   | 1 | 3 |
| 9902802  | E1  | 4 |   |   |   | 1 | 3 |   |   | 1 | 3 |   |   | 2 | 3 |   |   | 2 | 3 |   |   | 2 | 3 |   |   |
| 9902802  | E2  | 4 |   |   |   | 2 | 3 | 3 | 3 | 1 | 4 | 2 | 3 | 1 | 3 |   |   | 1 | 3 |   |   |   |   | 1 | 3 |
| 9902802  | E3  | 2 | 4 |   |   | 2 | 3 | 2 | 2 | 1 | 3 | 1 | 1 | 2 | 3 |   |   | 2 | 3 |   |   | 2 | 3 |   |   |
| 9902802  | E4  |   |   | 2 |   |   |   | 1 | 2 |   |   | 0 | 1 |   |   | 1 | 2 |   |   | 1 | 2 |   |   | 0 | 1 |
| 9908111  | E5  | 3 | 4 |   |   | 2 | 3 |   |   | 1 | 3 |   |   |   |   |   |   | 2 | 3 |   |   | 2 | 3 |   |   |
| 9908111  | E6  | 3 | 4 |   |   | 3 | 3 | 1 | 2 | 2 | 3 | 1 | 2 | 1 | 3 | 1 | 2 | 2 | 3 |   |   | 1 | 2 |   |   |
| 10239624 | E7  | 2 | 4 |   |   | 2 | 3 |   |   | 1 | 2 |   |   | 2 | 3 |   |   | 2 | 3 |   |   |   |   |   |   |
| 10239624 | E8  | 3 | 4 |   |   | 3 | 3 |   |   | 2 | 2 |   |   | 2 | 3 |   |   | 2 | 3 |   |   | 1 | 3 |   |   |
| 10239624 | E9  | 3 | 4 |   |   | 2 | 3 |   |   | 1 | 3 |   |   | 1 | 3 |   |   | 1 | 3 |   |   | 1 | 3 |   |   |
| 10239624 | E10 |   |   | 4 |   |   |   | 2 | 3 |   |   | 2 | 2 |   |   | 2 | 3 |   |   | 2 | 3 |   |   | 1 | 2 |
| 10310392 | E11 | 4 |   |   |   | 2 | 3 | 1 | 2 | 3 | 4 | 1 | 2 | 2 | 3 |   |   | 2 | 3 |   |   | 2 | 3 |   |   |
| 10310392 | E12 | 3 | 4 |   |   | 3 | 3 |   |   | 3 | 4 |   |   | 2 | 3 |   |   | 2 | 3 |   |   | 2 | 3 |   |   |
| 10624826 | E13 | 4 |   |   |   | 3 | 3 |   |   | 1 | 2 |   |   | 2 | 3 |   |   | 2 | 3 |   |   | 2 | 3 |   |   |
| 10624826 | E14 | 4 |   |   |   | 4 | 4 |   |   | 1 | 2 |   |   | 2 | 3 |   |   | 2 | 3 |   |   | 2 | 3 |   |   |
| 10624826 | E15 | 2 | 4 |   |   | 3 | 3 |   |   | 1 | 2 |   |   | 2 | 3 |   |   | 2 | 3 |   |   | 2 | 3 |   |   |
| 10624826 | E16 |   |   | 3 | 4 |   |   | 1 | 3 |   |   | 1 | 2 |   |   | 2 | 3 |   |   | 2 | 3 |   |   | 1 | 2 |
| 10625132 | E17 | 4 |   |   |   | 2 | 3 |   |   | 1 | 3 |   |   | 2 | 3 |   |   | 2 | 3 |   |   | 2 | 3 |   |   |
| 10625132 | E18 | 4 |   |   |   | 3 | 3 | 2 | 3 | 2 | 3 | 2 | 3 | 2 | 3 |   |   | 2 | 3 |   |   | 2 | 3 |   |   |
| 10812983 | E19 | 4 |   |   |   | 3 | 3 |   |   | 2 | 3 |   |   | 2 | 3 |   |   | 2 | 3 |   |   | 2 | 3 |   |   |
| 10812983 | E20 | 3 | 4 |   |   | 3 | 4 |   |   | 2 | 3 |   |   | 2 | 3 |   |   | 2 | 3 |   |   | 2 | 3 |   |   |
| 10812983 | E21 | 4 |   |   |   | 3 | 3 |   |   | 2 | 3 |   |   | 2 | 3 |   |   | 2 | 3 |   |   | 2 | 3 |   |   |
| 10812983 | E22 |   |   | 3 |   |   |   | 3 | 3 |   |   | 3 | 3 |   |   | 2 | 3 |   |   | 2 | 3 |   |   | 1 | 3 |
| 10817500 | E23 | 3 | 4 |   |   | 2 | 4 |   |   | 3 | 3 |   |   | 2 | 3 |   |   | 2 | 3 |   |   | 2 | 3 |   |   |

|          |     |   |   |   |   |   |   |   |   |   |   |   |   |   |   |   |   |   |   |   |   |   |   |   |   |   |
|----------|-----|---|---|---|---|---|---|---|---|---|---|---|---|---|---|---|---|---|---|---|---|---|---|---|---|---|
| 10817500 | E24 | 3 | 4 |   |   | 3 | 3 | 3 | 4 | 3 | 3 | 3 | 3 | 3 | 3 | 3 | 0 | 1 | 2 | 2 | 3 | 3 |   |   |   |   |
| 9901335  | F1  | 2 | 4 |   |   |   |   | 1 | 3 |   |   | 0 | 2 |   |   | 1 | 2 |   |   | 1 | 2 |   |   | 1 | 1 |   |
| 9901335  | F2  |   |   | 3 | 4 |   |   |   |   |   |   |   |   |   | 2 | 2 |   |   | 2 | 2 |   |   | 1 | 2 |   |   |
| 9901797  | F3  | 2 | 4 |   |   | 2 | 3 |   |   | 1 | 3 |   |   | 2 | 3 |   |   | 2 | 3 |   |   | 1 | 3 |   |   |   |
| 9901797  | F4  | 2 | 4 |   |   | 2 | 3 |   |   | 1 | 3 |   |   | 2 | 3 |   |   | 2 | 3 |   |   | 1 | 3 |   |   |   |
| 9901797  | F5  | 3 | 4 |   |   | 2 | 3 |   |   | 1 | 3 |   |   | 2 | 3 |   |   | 2 | 3 |   |   | 1 | 3 |   |   |   |
| 9901797  | F6  |   |   | 4 |   |   |   | 2 | 3 |   |   | 2 | 3 |   |   | 2 | 3 |   |   | 2 | 3 |   |   | 3 | 3 |   |
| 10238998 | F7  | 2 | 4 |   |   | 1 | 2 | 3 | 3 | 1 | 2 | 2 | 3 |   |   | 2 | 3 |   |   | 2 | 3 | 1 | 2 | 2 | 3 |   |
| 10238998 | F8  |   |   | 4 |   |   |   | 2 | 2 |   |   | 2 | 2 |   |   | 2 | 3 |   |   | 2 | 3 |   |   | 2 | 3 |   |
| 10239551 | F9  | 3 | 4 |   |   | 1 | 2 | 1 | 2 | 3 | 3 | 2 | 2 | 2 | 3 |   |   | 2 | 3 |   |   | 2 | 3 |   |   |   |
| 10239551 | F10 | 3 | 4 |   |   | 2 | 2 | 2 | 3 | 1 | 2 | 2 | 2 | 2 | 3 |   |   | 2 | 3 |   |   | 1 | 3 | 1 | 3 |   |
| 10239551 | F11 | 4 |   |   |   |   |   | 1 | 3 |   |   | 2 | 2 |   |   |   |   | 2 | 3 |   |   | 2 | 3 |   |   |   |
| 10239551 | F12 |   |   | 4 |   |   |   |   |   |   |   |   |   |   |   |   |   |   |   |   |   |   |   |   |   |   |
| 10613128 | F13 | 4 |   |   |   | 3 | 4 |   |   | 3 | 4 |   |   | 2 | 3 |   |   | 2 | 3 |   |   | 2 | 3 |   |   |   |
| 10613128 | F14 |   |   | 4 |   |   |   | 2 | 3 |   |   | 2 | 2 |   |   | 2 | 3 |   |   | 2 | 3 |   |   | 2 | 3 |   |
| 10622130 | F15 | 3 | 4 |   |   | 2 | 3 | 2 | 3 | 2 | 3 | 2 | 3 | 2 | 3 | 2 | 3 | 2 | 3 | 2 | 3 | 1 | 3 | 1 | 3 |   |
| 10622130 | F16 | 4 |   |   |   |   |   |   |   |   |   |   |   | 3 | 3 |   |   | 3 | 3 |   |   |   |   |   |   |   |
| 10622130 | F17 | 3 | 4 |   |   | 2 | 3 | 2 | 3 | 2 | 3 | 2 | 3 | 3 | 3 |   |   | 3 | 3 |   |   | 2 | 3 |   |   |   |
| 10622130 | F18 |   |   | 2 | 4 | 3 | 3 | 1 | 2 | 1 | 1 | 2 | 3 | 2 | 3 |   |   | 2 | 3 |   |   | 2 | 3 |   |   |   |
| 10736608 | F19 | 3 | 4 |   |   | 2 | 3 | 2 | 2 | 2 | 3 | 2 | 2 | 2 | 3 |   |   | 2 | 3 |   |   | 2 | 3 |   |   |   |
| 10736608 | F20 |   |   | 2 | 4 |   |   | 1 | 2 |   |   | 1 | 2 |   |   |   | 2 | 3 |   |   | 2 | 3 |   |   | 1 | 3 |
| 10811752 | F21 | 3 | 4 |   |   | 3 | 4 |   |   | 3 | 4 |   |   | 2 | 3 |   |   | 2 | 3 |   |   | 3 | 3 |   |   |   |
| 10811752 | F22 | 3 | 4 |   |   | 3 | 4 |   |   | 3 | 3 |   |   | 2 | 3 |   |   | 2 | 3 |   |   | 1 | 3 |   |   |   |
| 10811752 | F23 | 3 | 4 |   |   | 2 | 3 |   |   | 2 | 3 |   |   | 2 | 3 |   |   | 2 | 3 |   |   | 2 | 3 |   |   |   |
| 10811752 | F24 |   |   | 2 | 4 |   |   | 2 | 3 |   |   | 1 | 2 |   |   | 1 | 3 |   |   | 1 | 3 |   |   | 1 | 3 |   |
| 9901036  | G1  | 4 |   |   |   | 3 | 3 |   |   | 3 | 4 |   |   | 3 | 3 |   |   | 3 | 3 |   |   | 2 | 3 |   |   |   |
| 9901036  | G2  | 4 |   |   |   | 1 | 3 |   |   | 1 | 3 |   |   | 1 | 3 |   |   | 1 | 3 |   |   | 0 | 3 |   |   |   |
| 9901036  | G3  | 4 |   |   |   | 3 | 4 |   |   | 3 | 4 |   |   | 3 | 3 |   |   | 3 | 3 |   |   | 3 | 3 |   |   |   |
| 9901036  | G4  |   |   | 4 |   |   |   | 2 | 3 |   |   | 2 | 4 |   |   | 2 | 3 |   |   | 2 | 3 |   |   | 2 | 3 |   |
| 9901335  | G5  | 3 | 4 |   |   | 2 | 3 |   |   | 2 | 3 |   |   |   |   |   | 2 | 3 |   |   | 2 | 3 |   |   |   |   |
| 9901335  | G6  | 4 |   |   |   |   |   |   |   |   |   | 2 | 3 | 1 | 2 | 1 | 2 | 1 | 3 |   |   | 0 | 3 | 1 | 3 |   |
| 10217305 | G7  | 1 | 4 |   |   | 1 | 2 |   |   | 1 | 2 |   |   | 1 | 3 |   |   | 1 | 3 |   |   | 0 | 3 |   |   |   |
| 10217305 | G8  | 2 | 4 |   |   | 2 | 3 |   |   | 2 | 3 |   |   | 1 | 3 |   |   | 1 | 3 |   |   | 0 | 3 |   |   |   |
| 10217305 | G9  | 2 | 4 |   |   | 1 | 3 |   |   | 1 | 3 |   |   | 1 | 3 |   |   | 1 | 3 |   |   | 0 | 3 |   |   |   |
| 10217305 | G10 |   |   | 3 | 4 |   |   | 2 | 3 |   |   | 2 | 2 | 2 | 3 |   |   | 2 | 3 |   |   |   |   | 2 | 3 |   |
| 10238998 | G11 |   |   |   |   |   |   |   |   |   |   |   |   |   |   |   |   |   |   |   |   | 2 | 3 |   |   |   |
| 10238998 | G12 |   |   |   |   |   |   | 1 | 1 |   |   | 1 | 2 |   |   | 1 | 2 |   |   | 1 | 2 |   |   | 2 | 3 |   |
| 10607452 | G13 | 2 | 4 |   |   | 2 | 3 |   |   | 1 | 2 |   |   | 1 | 3 |   |   | 1 | 3 |   |   | 1 | 3 |   |   |   |
| 10607452 | G14 | 3 | 4 |   |   | 2 | 3 |   |   | 1 | 2 |   |   | 1 | 3 |   |   | 1 | 3 |   |   | 1 | 3 |   |   |   |
| 10607452 | G15 | 3 | 4 |   |   | 2 | 3 |   |   | 1 | 3 |   |   | 1 | 3 |   |   | 1 | 3 |   |   | 1 | 3 |   |   |   |
| 10607452 | G16 |   |   | 3 | 4 |   |   | 2 | 3 |   |   | 1 | 2 |   |   | 1 | 3 |   |   | 1 | 3 |   |   | 1 | 3 |   |
| 10613128 | G17 | 4 |   |   |   | 4 | 4 |   |   | 3 | 4 |   |   | 2 | 3 |   |   | 2 | 3 |   |   | 3 | 3 |   |   |   |
| 10613128 | G18 | 4 |   |   |   | 3 | 4 |   |   | 3 | 4 |   |   | 2 | 3 |   |   | 2 | 3 |   |   | 3 | 3 |   |   |   |
| 10734364 | G19 | 3 | 4 |   |   | 2 | 3 | 1 | 2 | 3 | 4 | 2 | 3 | 3 | 3 | 1 | 2 | 3 | 3 | 1 | 2 | 3 | 3 |   |   |   |
| 10734364 | G20 | 3 | 4 |   |   | 2 | 3 | 1 | 1 | 3 | 4 | 3 | 3 | 2 | 3 |   |   | 2 | 3 |   |   | 3 | 3 | 2 | 3 |   |
| 10734364 | G21 | 3 | 4 |   |   | 1 | 3 | 2 | 2 | 3 | 4 | 3 | 3 | 2 | 3 |   |   | 2 | 3 |   |   | 3 | 3 |   |   |   |

|          |     |   |   |   |   |   |   |   |   |   |   |   |   |   |   |   |   |   |   |   |   |   |   |   |   |
|----------|-----|---|---|---|---|---|---|---|---|---|---|---|---|---|---|---|---|---|---|---|---|---|---|---|---|
| 10734364 | G22 |   |   | 3 | 4 |   |   | 2 | 3 |   |   | 2 | 3 | 2 | 3 |   |   | 2 | 3 |   |   |   |   | 1 | 2 |
| 10736608 | G23 | 3 | 4 |   |   | 2 | 3 | 2 | 2 | 3 | 4 | 2 | 3 | 2 | 3 |   |   | 2 | 3 |   |   | 2 | 3 |   |   |
| 10736608 | G24 | 3 | 4 |   |   | 1 | 3 |   |   | 2 | 3 |   |   | 1 | 3 |   |   | 1 | 3 |   |   | 1 | 3 |   |   |
| 9841708  | H1  | 3 | 4 |   |   | 2 | 3 |   |   | 2 | 3 |   |   | 1 | 3 |   |   | 1 | 3 |   |   | 3 | 3 |   |   |
| 9841708  | H2  |   |   | 3 | 4 |   |   | 1 | 2 |   |   | 1 | 2 |   |   | 1 | 2 |   |   | 1 | 2 |   |   | 1 | 3 |
| 9842434  | H3  | 4 |   |   |   | 1 | 3 |   |   | 1 | 3 |   |   | 2 | 3 |   |   | 2 | 3 |   |   | 1 | 3 |   |   |
| 9842434  | H4  | 4 |   |   |   | 2 | 3 |   |   | 2 | 3 |   |   | 3 | 3 |   |   | 3 | 3 |   |   | 3 | 3 |   |   |
| 9842434  | H5  | 4 |   |   |   | 1 | 3 |   |   | 2 | 3 |   |   | 3 | 3 |   |   | 3 | 3 |   |   | 3 | 3 |   |   |
| 9842434  | H6  |   |   | 3 | 4 |   |   | 2 | 3 |   |   | 2 | 2 |   |   | 2 | 3 |   |   | 2 | 3 |   |   | 2 | 3 |
| 10213893 | H7  | 3 | 4 |   |   |   |   | 2 | 2 |   |   | 2 | 2 |   |   | 2 | 3 |   |   | 2 | 3 |   |   | 2 | 3 |
| 10213893 | H8  |   |   | 4 |   | 3 | 3 | 2 | 3 | 2 | 3 | 2 | 3 |   |   | 3 | 3 |   |   | 3 | 3 |   |   | 2 | 3 |
| 10217220 | H9  | 3 | 4 |   |   | 1 | 3 |   |   | 1 | 3 |   |   | 1 | 3 |   |   | 1 | 3 |   |   | 0 | 3 |   |   |
| 10217220 | H10 | 3 | 4 |   |   | 1 | 3 |   |   | 1 | 2 |   |   | 1 | 3 |   |   | 1 | 3 |   |   | 1 | 3 |   |   |
| 10217220 | H11 | 3 | 4 |   |   | 3 | 4 |   |   | 3 | 3 |   |   | 3 | 3 |   |   | 3 | 3 |   |   | 2 | 3 |   |   |
| 10217220 | H12 |   |   | 3 | 4 |   |   | 2 | 3 |   |   | 1 | 3 |   |   | 1 | 3 |   |   | 1 | 3 |   |   |   |   |
| 10604940 | H13 | 4 |   |   |   | 3 | 4 |   |   | 3 | 4 |   |   | 3 | 3 |   |   | 3 | 3 |   |   | 2 | 3 |   |   |
| 10604940 | H14 |   |   | 3 | 4 | 2 | 3 |   |   | 2 | 2 |   |   |   |   | 2 | 3 |   |   | 2 | 3 |   |   | 1 | 3 |
| 10606082 | H15 | 4 |   |   |   | 1 | 3 | 3 | 3 | 1 | 3 | 3 | 4 | 1 | 3 |   |   | 1 | 3 |   |   | 2 | 3 | 2 | 3 |
| 10606082 | H16 | 3 | 4 |   |   | 3 | 3 |   |   | 1 | 2 |   |   | 2 | 3 |   |   | 2 | 3 |   |   | 2 | 3 |   |   |
| 10606082 | H17 | 3 | 4 |   |   | 3 | 3 |   |   | 1 | 2 |   |   | 2 | 3 |   |   | 2 | 3 |   |   | 2 | 3 | 0 | 1 |
| 10606082 | H18 |   |   | 4 |   |   |   | 2 | 3 |   |   | 1 | 2 |   |   | 2 | 3 |   |   | 2 | 3 |   |   | 2 | 3 |
| 10729892 | H19 | 4 |   |   |   | 2 | 4 | 3 | 3 | 2 | 3 | 1 | 3 | 2 | 3 |   |   | 2 | 3 |   |   | 1 | 3 |   |   |
| 10729892 | H20 |   |   | 3 | 4 | 2 | 3 | 3 | 4 | 2 | 3 | 1 | 3 | 2 | 3 | 2 | 3 | 2 | 3 | 2 | 3 | 2 | 3 | 0 | 2 |
| 10732505 | H21 | 3 | 4 |   |   | 2 | 3 |   |   | 2 | 3 |   |   | 2 | 2 |   |   | 2 | 2 |   |   | 2 | 3 |   |   |
| 10732505 | H22 | 3 | 4 |   |   | 3 | 4 |   |   | 2 | 3 |   |   | 2 | 3 |   |   | 2 | 3 |   |   | 2 | 3 |   |   |
| 10732505 | H23 | 3 | 4 |   |   | 3 | 4 |   |   | 2 | 3 |   |   | 2 | 3 |   |   | 2 | 3 |   |   | 2 | 3 |   |   |
| 10732505 | H24 |   |   | 3 | 4 |   |   | 2 | 4 |   |   | 1 | 3 |   |   | 2 | 3 |   |   | 2 | 3 |   |   | 0 | 1 |
| 9839857  | I1  | 3 | 4 |   |   | 2 | 3 |   |   | 1 | 3 |   |   | 2 | 3 |   |   | 2 | 3 |   |   | 2 | 3 |   |   |
| 9839857  | I2  | 4 |   |   |   | 1 | 1 | 2 | 3 | 2 | 3 | 2 | 3 | 3 | 3 |   |   | 3 | 3 |   |   |   |   | 2 | 3 |
| 9839857  | I3  | 4 |   |   |   |   |   | 2 | 2 |   |   | 1 | 2 |   |   | 2 | 3 |   |   | 2 | 3 |   |   | 0 | 3 |
| 9839857  | I4  |   |   | 4 |   |   |   | 2 | 3 |   |   | 1 | 2 |   |   | 2 | 3 |   |   | 2 | 3 |   |   | 2 | 3 |
| 9841708  | I5  |   |   |   |   | 2 | 3 |   |   | 1 | 3 |   |   | 2 | 3 |   |   | 2 | 3 |   |   | 3 | 3 |   |   |
| 9841708  | I6  | 2 | 4 |   |   | 1 | 2 | 1 | 2 | 1 | 3 | 2 | 2 | 2 | 3 |   |   | 2 | 3 |   |   | 3 | 3 |   |   |
| 10212172 | I7  |   |   |   |   |   |   |   |   |   |   |   |   |   |   |   |   |   |   |   |   |   |   |   |   |
| 10212172 | I8  | 3 | 4 |   |   | 1 | 2 |   |   | 2 | 3 |   |   | 1 | 3 |   |   | 1 | 3 |   |   | 2 | 3 |   |   |
| 10212172 | I9  | 3 | 4 |   |   | 0 | 2 |   |   | 1 | 2 |   |   | 1 | 3 |   |   | 1 | 3 |   |   | 1 | 3 |   |   |
| 10212172 | I10 |   |   | 3 | 4 |   |   | 2 | 3 |   |   | 2 | 3 |   |   | 2 | 3 |   |   | 2 | 3 |   |   | 1 | 3 |
| 10213893 | I11 | 4 |   |   |   | 2 | 2 | 2 | 3 | 3 | 3 | 2 | 3 | 2 | 3 |   |   | 2 | 3 |   |   | 2 | 3 |   |   |
| 10213893 | I12 | 3 | 4 |   |   | 1 | 3 |   |   | 2 | 3 |   |   | 1 | 3 |   |   | 1 | 3 |   |   | 2 | 3 |   |   |
| 10601619 | I13 | 3 | 4 |   |   | 2 | 3 | 2 | 3 | 2 | 3 | 2 | 3 | 2 | 3 | 2 | 3 | 2 | 3 | 2 | 3 | 2 | 3 |   |   |
| 10601619 | I14 | 3 | 4 |   |   | 3 | 3 | 1 | 3 | 1 | 3 | 2 | 3 | 2 | 3 | 2 | 3 | 2 | 3 | 2 | 3 | 2 | 3 | 2 | 3 |
| 10601619 | I15 | 4 |   |   |   | 3 | 3 | 2 | 3 | 2 | 3 | 2 | 3 | 2 | 3 | 2 | 3 | 2 | 3 | 2 | 3 | 2 | 3 | 1 | 3 |
| 10601619 | I16 |   |   | 4 |   |   |   | 1 | 3 |   |   | 2 | 3 |   |   | 2 | 3 |   |   | 2 | 3 |   |   | 2 | 3 |
| 10604940 | I17 | 4 |   |   |   | 2 | 4 |   |   | 2 | 4 |   |   | 3 | 3 |   |   | 3 | 3 |   |   | 3 | 3 |   |   |
| 10604940 | I18 | 3 | 4 |   |   | 3 | 3 |   |   | 2 | 4 |   |   | 3 | 3 |   |   | 3 | 3 |   |   | 3 | 3 |   |   |
| 10729632 | I19 | 4 |   |   |   | 3 | 4 |   |   | 2 | 4 |   |   | 3 | 3 |   |   | 3 | 3 |   |   | 3 | 3 |   |   |

|          |     |   |   |   |   |   |   |   |   |   |   |   |   |   |   |   |   |   |   |   |   |   |   |   |   |
|----------|-----|---|---|---|---|---|---|---|---|---|---|---|---|---|---|---|---|---|---|---|---|---|---|---|---|
| 10729632 | I20 | 4 |   |   |   | 3 | 4 |   |   | 2 | 4 |   |   | 3 | 3 |   |   | 3 | 3 |   |   | 3 | 3 |   |   |
| 10729632 | I21 | 3 | 4 |   |   | 3 | 4 |   |   | 2 | 3 |   |   | 2 | 3 |   |   | 2 | 3 |   |   | 3 | 3 |   |   |
| 10729632 | I22 |   |   | 3 | 4 |   |   | 1 | 1 |   |   | 1 | 2 |   |   | 1 | 3 |   |   | 1 | 3 |   |   | 0 | 1 |
| 10729892 | I23 | 3 | 4 |   |   | 2 | 3 |   |   | 2 | 3 |   |   | 2 | 3 |   |   | 2 | 3 |   |   | 2 | 3 | 2 | 2 |
| 10729892 | I24 | 3 | 4 |   |   | 2 | 4 |   |   | 2 | 3 |   |   | 2 | 3 |   |   | 2 | 3 |   |   | 2 | 3 | 2 | 3 |
| 9832740S | J01 | 3 | 4 |   |   | 1 | 2 | 1 | 2 | 3 | 3 | 1 | 1 | 3 | 3 | 1 | 1 | 3 | 3 | 1 | 1 | 3 | 3 | 1 | 2 |
| 9832740S | J02 |   |   | 3 | 4 |   |   | 1 | 2 |   |   | 1 | 2 |   |   | 1 | 2 |   |   | 1 | 2 |   |   | 1 | 3 |
| 9838248  | J03 | 3 | 4 |   |   | 2 | 3 | 2 | 3 | 1 | 3 | 1 | 2 | 1 | 3 |   |   | 1 | 3 |   |   | 1 | 2 | 3 | 3 |
| 9838248  | J04 | 3 | 4 |   |   | 2 | 3 |   |   | 1 | 2 |   |   | 1 | 3 |   |   | 1 | 3 |   |   | 1 | 2 |   |   |
| 9838248  | J05 | 4 |   |   |   | 2 | 3 | 1 | 3 | 1 | 3 | 1 | 3 | 2 | 3 |   |   | 2 | 3 |   |   | 1 | 2 | 2 | 3 |
| 9838248  | J06 |   |   | 4 |   |   |   | 2 | 3 |   |   | 2 | 3 |   |   | 2 | 3 |   |   | 2 | 3 |   |   | 0 | 2 |
| 10203428 | J07 | 4 |   |   |   | 2 | 3 |   |   | 1 | 4 |   |   | 2 | 3 |   |   | 2 | 3 |   |   | 1 | 3 |   |   |
| 10203428 | J08 |   |   | 4 |   |   |   | 2 | 3 |   |   | 1 | 3 |   |   | 2 | 3 |   |   | 2 | 3 |   |   | 1 | 3 |
| 10204696 | J09 | 4 |   |   |   |   |   | 1 | 2 |   |   | 1 | 3 |   |   | 2 | 3 |   |   | 2 | 3 |   |   | 1 | 2 |
| 10204696 | J10 | 3 | 4 |   |   | 2 | 3 |   |   | 2 | 3 |   |   | 2 | 3 |   |   | 2 | 3 |   |   | 2 | 3 |   |   |
| 10204696 | J11 | 4 |   |   |   | 2 | 3 |   |   | 2 | 4 |   |   | 2 | 3 |   |   | 2 | 3 |   |   | 2 | 3 |   |   |
| 10204696 | J12 |   |   | 2 | 4 |   |   | 1 | 2 |   |   | 0 | 1 |   |   | 2 | 3 |   |   | 2 | 3 |   |   | 1 | 2 |
| 10514489 | J13 | 2 | 4 |   |   | 2 | 3 |   |   | 2 | 3 | 1 | 1 | 1 | 3 |   |   | 1 | 3 |   |   | 2 | 3 | 2 | 3 |
| 10514489 | J14 |   |   | 2 | 4 |   |   | 1 | 2 |   |   | 1 | 2 |   |   | 1 | 3 |   |   | 1 | 3 |   |   | 1 | 3 |
| 10529151 | J15 | 2 | 4 |   |   | 1 | 3 |   |   | 1 | 3 | 1 | 2 | 1 | 3 |   |   | 2 | 3 |   |   | 0 | 2 |   |   |
| 10529151 | J16 | 2 | 4 |   |   | 1 | 3 |   |   | 1 | 3 |   |   | 1 | 3 |   |   | 2 | 3 |   |   | 1 | 2 |   |   |
| 10529151 | J17 | 2 | 4 |   |   | 1 | 3 |   |   | 1 | 3 |   |   | 2 | 3 |   |   | 2 | 3 |   |   | 1 | 2 |   |   |
| 10529151 | J18 |   |   | 3 | 4 | 2 | 3 |   |   | 2 | 4 |   |   | 3 | 3 |   |   | 3 | 3 |   |   | 2 | 3 |   |   |
| 10727106 | J19 | 4 |   |   |   | 2 | 4 |   |   | 2 | 4 |   |   | 2 | 3 |   |   | 2 | 3 |   |   | 3 | 3 |   |   |
| 10727106 | J20 |   |   | 4 |   | 3 | 4 |   |   |   |   | 3 | 3 |   |   | 2 | 3 |   |   | 2 | 3 |   |   | 2 | 3 |
| 10728457 | J21 |   |   |   |   |   |   |   |   |   |   |   |   |   |   |   |   |   |   |   |   |   |   |   |   |
| 10728457 | J22 | 3 | 4 |   |   | 3 | 4 |   |   | 2 | 4 |   |   | 2 | 3 |   |   | 2 | 3 |   |   | 2 | 3 |   |   |
| 10728457 | J23 | 3 | 4 |   |   | 3 | 4 |   |   | 3 | 3 |   |   | 2 | 3 |   |   | 2 | 3 |   |   | 1 | 3 |   |   |
| 10728457 | J24 |   |   | 3 | 4 |   |   | 2 | 3 |   |   | 2 | 3 |   |   | 2 | 3 |   |   | 2 | 3 |   |   | 2 | 3 |
| 9832588  | K1  | 2 | 4 |   |   | 2 | 3 |   |   | 1 | 3 |   |   | 2 | 3 |   |   | 2 | 3 |   |   | 2 | 3 |   |   |
| 9832588  | K2  | 3 | 4 |   |   | 2 | 3 |   |   | 1 | 3 | 2 | 3 | 2 | 3 |   |   | 2 | 3 |   |   | 2 | 3 |   |   |
| 9832588  | K3  | 3 | 4 |   |   | 2 | 3 |   |   | 1 | 2 |   |   | 2 | 3 |   |   | 2 | 3 |   |   | 3 | 3 |   |   |
| 9832588  | K4  |   |   | 4 |   | 2 | 3 |   |   | 2 | 3 |   |   |   |   | 1 | 2 |   |   | 1 | 2 |   |   | 0 | 3 |
| 9832740S | K5  | 4 |   |   |   |   |   | 2 | 3 |   |   | 1 | 3 | 3 | 3 |   |   | 3 | 3 |   |   | 3 | 3 |   |   |
| 9832740S | K6  | 4 |   |   |   | 2 | 3 |   |   | 2 | 3 |   |   | 3 | 3 |   |   | 3 | 3 |   |   | 3 | 3 |   |   |
| 10136806 | K7  | 4 |   |   |   | 1 | 2 |   |   | 1 | 3 |   |   | 2 | 2 |   |   | 3 | 3 |   |   | 2 | 3 |   |   |
| 10136806 | K8  | 3 | 4 |   |   | 2 | 3 | 1 | 2 | 1 | 2 | 1 | 2 | 2 | 3 | 2 | 2 | 3 | 3 | 2 | 3 | 2 | 3 | 1 | 2 |
| 10136806 | K9  | 4 |   |   |   | 2 | 3 |   |   | 1 | 2 | 1 | 2 | 2 | 3 | 3 |   | 3 | 3 |   |   | 2 | 3 |   |   |
| 10136806 | K10 |   |   | 4 |   |   |   | 1 | 2 |   |   | 1 | 2 |   |   | 2 | 3 |   |   | 2 | 3 |   |   | 1 | 2 |
| 10203428 | K11 | 2 | 4 |   |   | 2 | 3 |   |   | 1 | 3 |   |   | 2 | 3 |   |   | 2 | 3 |   |   | 3 | 3 |   |   |
| 10203428 | K12 | 4 |   |   |   | 2 | 3 |   |   | 1 | 3 |   |   | 2 | 3 |   |   | 2 | 3 |   |   | 2 | 3 |   |   |
| 10513260 | K13 |   |   |   |   |   |   |   |   |   |   |   |   |   |   |   |   |   |   |   |   |   |   |   |   |
| 10513260 | K14 |   |   |   |   |   |   |   |   |   |   |   |   |   |   |   |   |   |   |   |   |   |   |   |   |
| 10513260 | K15 | 3 | 4 |   |   | 1 | 2 |   |   | 2 | 3 |   |   | 2 | 3 |   |   | 2 | 3 |   |   | 2 | 3 | 1 | 2 |
| 10513260 | K16 |   |   | 2 | 4 | 2 | 3 | 0 | 1 | 3 | 3 | 1 | 2 | 2 | 3 | 1 | 2 | 2 | 3 | 1 | 2 | 2 | 3 | 1 | 2 |
| 10514489 | K17 | 4 |   |   |   | 2 | 3 |   |   | 3 | 3 |   |   | 2 | 3 |   |   | 2 | 3 |   |   | 2 | 3 | 3 | 3 |





|          |     |   |   |   |   |   |   |   |   |   |   |   |   |   |   |   |   |   |   |   |   |   |   |   |   |
|----------|-----|---|---|---|---|---|---|---|---|---|---|---|---|---|---|---|---|---|---|---|---|---|---|---|---|
| 10443208 | M16 |   |   | 3 | 4 |   |   | 1 | 2 |   |   | 1 | 3 |   |   | 2 | 3 |   |   | 2 | 3 |   |   | 1 | 3 |
| 10511812 | M17 | 2 | 4 |   |   | 0 | 2 |   |   | 1 | 3 |   |   | 1 | 3 |   |   | 1 | 3 |   |   | 0 | 3 |   |   |
| 10511812 | M18 | 3 | 4 |   |   | 1 | 2 |   |   | 1 | 2 |   |   | 1 | 3 |   |   | 1 | 3 |   |   | 1 | 3 |   |   |
| 10725463 | M19 |   |   |   |   |   |   |   |   |   |   |   |   |   |   |   |   |   |   |   |   |   |   |   |   |
| 10725463 | M20 | 4 |   |   |   | 2 | 3 | 1 | 1 | 3 | 4 | 1 | 2 | 2 | 3 |   |   | 2 | 3 |   |   | 3 | 3 |   |   |
| 10725463 | M21 | 4 |   |   |   | 3 | 3 |   |   | 3 | 4 |   |   | 2 | 3 |   |   | 2 | 3 |   |   | 3 | 3 |   |   |
| 10725463 | M22 |   |   | 3 |   |   |   | 1 | 2 |   |   | 1 | 2 |   |   | 1 | 3 |   |   | 1 | 3 |   |   | 1 | 3 |
| 10726179 | M23 | 3 | 4 |   |   | 1 | 3 |   |   | 1 | 3 |   |   | 2 | 3 |   |   | 2 | 3 |   |   | 1 | 3 |   |   |
| 10726179 | M24 | 3 | 4 |   |   | 2 | 4 |   |   | 1 | 2 |   |   | 2 | 3 |   |   | 2 | 3 |   |   | 2 | 3 |   |   |
| 9823371  | N1  | 3 | 4 |   |   |   |   |   |   |   |   |   |   | 2 | 3 |   |   | 2 | 3 |   |   | 3 | 3 | 2 | 3 |
| 9823371  | N2  |   |   | 3 | 4 |   |   | 2 | 3 |   |   | 2 | 3 |   |   | 2 | 3 |   |   | 2 | 3 |   |   | 2 | 2 |
| 9826099S | N3  |   |   |   |   |   |   |   |   |   |   |   |   |   |   |   |   |   |   |   |   |   |   |   |   |
| 9826099S | N4  | 3 | 4 |   |   |   |   | 1 | 2 |   |   | 1 | 1 |   |   | 3 | 3 |   |   | 3 | 3 |   |   | 2 | 2 |
| 9826099S | N5  | 2 | 4 |   |   | 1 | 2 | 1 | 2 | 1 | 2 | 1 | 2 | 2 | 2 | 2 | 3 | 2 | 2 | 2 | 3 |   |   | 2 | 2 |
| 9826099S | N6  |   |   | 3 | 4 | 2 | 3 | 1 | 2 | 2 | 3 | 1 | 2 |   |   | 2 | 3 |   |   | 2 | 3 |   |   | 2 | 3 |
| 10022186 | N7  | 3 | 4 |   |   | 2 | 3 |   |   | 3 | 3 |   |   | 3 | 3 |   |   | 3 | 3 |   |   | 3 | 3 |   |   |
| 10022186 | N8  |   |   |   |   |   |   |   |   |   |   |   |   |   |   | 2 | 3 |   |   |   |   |   |   | 2 | 3 |
| 10027530 | N9  | 3 | 4 |   |   | 1 | 3 |   |   | 2 | 3 |   |   | 2 | 3 |   |   | 2 | 3 |   |   | 1 | 3 |   |   |
| 10027530 | N10 | 1 |   | 3 | 4 | 0 | 3 | 2 | 3 | 1 | 2 | 2 | 2 | 1 | 3 | 2 | 3 | 1 | 3 | 2 | 3 | 1 | 3 |   |   |
| 10027530 | N11 | 2 | 4 |   |   | 0 | 3 | 2 | 3 | 1 | 2 | 2 | 2 | 2 | 3 | 2 | 3 | 2 | 3 | 2 | 3 | 2 | 3 |   |   |
| 10027530 | N12 |   |   | 2 | 3 |   |   | 1 | 2 |   |   | 1 | 2 |   |   | 2 | 2 |   |   | 2 | 2 |   |   | 2 | 3 |
| 10431981 | N13 | 3 | 4 |   |   | 0 | 3 |   |   | 2 | 4 | 2 | 4 | 3 | 3 |   |   | 3 | 3 |   |   | 1 | 3 |   |   |
| 10431981 | N14 |   |   | 4 |   |   |   | 2 | 3 |   |   | 2 | 3 |   |   | 3 | 3 |   |   | 3 | 3 |   |   | 2 | 3 |
| 10433224 | N15 | 4 |   |   |   |   |   | 1 | 2 |   |   | 2 | 3 |   |   | 2 | 3 |   |   | 2 | 3 |   |   | 1 | 2 |
| 10433224 | N16 | 3 | 4 |   |   | 1 | 3 | 1 | 2 | 3 | 3 | 2 | 2 | 1 | 3 | 2 | 3 | 1 | 3 | 2 | 3 | 2 | 3 | 1 | 1 |
| 10433224 | N17 | 3 | 4 |   |   | 3 | 4 | 1 | 1 | 2 | 3 | 2 | 2 | 3 | 3 |   |   | 3 | 3 |   |   | 2 | 3 |   |   |
| 10433224 | N18 |   |   | 3 | 4 |   |   | 1 | 1 |   |   | 2 | 3 | 2 | 3 | 2 | 3 |   |   | 2 | 3 |   |   | 0 | 3 |
| 10718773 | N19 | 3 | 4 |   |   | 0 | 1 |   |   | 3 | 4 |   |   | 3 | 3 |   |   | 3 | 3 |   |   |   |   |   |   |
| 10718773 | N20 |   |   | 3 | 4 |   |   | 1 | 2 |   |   | 2 | 3 |   |   | 2 | 3 |   |   | 2 | 3 |   |   | 1 | 2 |
| 10720178 | N21 | 3 | 4 |   |   |   |   | 2 | 3 |   |   | 3 | 3 |   |   | 2 | 3 |   |   | 2 | 3 |   |   | 2 | 3 |
| 10720178 | N22 | 3 | 4 |   |   | 2 | 3 |   |   | 2 | 3 |   |   | 2 | 3 |   |   | 2 | 3 |   |   | 1 | 3 |   |   |
| 10720178 | N23 | 3 | 4 |   |   | 1 | 3 |   |   | 2 | 3 | 3 | 3 | 2 | 3 |   |   | 2 | 3 |   |   | 2 | 3 |   |   |
| 10720178 | N24 |   |   | 3 | 4 |   |   | 1 | 1 |   |   | 1 | 2 | 2 | 3 |   |   | 2 | 3 |   |   |   |   | 1 | 2 |
| 9823060  | O1  | 2 | 4 |   |   |   |   | 1 | 3 |   |   | 1 | 2 |   |   | 2 | 3 |   |   | 2 | 3 |   |   | 1 | 3 |
| 9823060  | O2  | 3 | 4 |   |   | 2 | 3 | 1 | 3 | 1 | 2 | 1 | 3 | 2 | 3 | 1 | 3 | 2 | 3 | 1 | 3 | 2 | 3 | 1 | 2 |
| 9823060  | O3  | 4 |   |   |   | 2 | 3 | 2 | 3 | 2 | 3 | 1 | 2 |   |   | 2 | 3 |   |   | 2 | 3 |   |   | 1 | 2 |
| 9823060  | O4  |   |   | 4 |   |   |   | 3 | 3 |   |   | 2 | 2 |   |   | 2 | 3 |   |   | 2 | 3 |   |   | 2 | 3 |
| 9823371  | O5  | 4 |   |   |   |   |   |   |   |   |   |   |   |   |   |   |   |   |   |   |   |   |   |   |   |
| 9823371  | O6  | 3 | 4 |   |   | 2 | 3 | 3 | 3 | 2 | 3 | 3 | 3 | 2 | 3 | 3 | 3 | 2 | 3 | 3 | 3 |   |   | 3 | 3 |
| 10015784 | O7  | 4 |   |   |   | 3 | 3 | 3 | 3 | 3 | 3 | 3 | 3 | 2 | 3 | 2 | 3 | 2 | 3 | 2 | 3 |   |   | 3 | 3 |
| 10015784 | O8  | 3 | 4 |   |   | 3 | 3 |   |   | 2 | 3 |   |   | 3 | 3 |   |   | 3 | 3 |   |   | 3 | 3 |   |   |
| 10015784 | O9  | 3 | 4 |   |   | 3 | 4 |   |   | 3 | 4 |   |   | 3 | 3 |   |   | 3 | 3 |   |   | 3 | 3 |   |   |
| 10015784 | O10 |   |   | 3 | 4 |   |   | 3 | 3 |   |   | 2 | 3 |   |   | 2 | 3 |   |   | 2 | 3 |   |   | 2 | 3 |
| 10022186 | O11 | 3 | 4 |   |   | 3 | 3 | 3 | 3 | 2 | 3 | 2 | 3 | 3 | 3 |   |   | 3 | 3 |   |   | 3 | 3 |   |   |
| 10022186 | O12 | 3 | 4 |   |   | 3 | 3 |   |   | 3 | 3 |   |   | 3 | 3 |   |   | 3 | 3 |   |   | 3 | 3 |   |   |
| 10426270 | O13 | 3 | 4 |   |   | 2 | 3 |   |   | 1 | 3 |   |   | 1 | 3 |   |   | 1 | 3 |   |   | 1 | 3 |   |   |

|          |     |   |   |   |   |   |   |   |   |   |   |   |   |   |   |   |   |   |   |   |   |   |   |   |   |
|----------|-----|---|---|---|---|---|---|---|---|---|---|---|---|---|---|---|---|---|---|---|---|---|---|---|---|
| 10426270 | O14 | 2 | 4 |   |   | 1 | 3 | 1 | 2 | 1 | 3 | 1 | 3 | 1 | 3 |   |   | 1 | 3 |   |   | 1 | 3 |   |   |
| 10426270 | O15 | 2 | 4 |   |   | 1 | 3 |   |   | 1 | 3 |   |   | 1 | 3 |   |   | 1 | 3 |   |   | 1 | 3 |   |   |
| 10426270 | O16 |   |   | 3 | 4 |   |   | 3 | 3 |   |   | 2 | 3 |   |   | 3 | 3 |   |   | 3 | 3 |   |   | 1 | 3 |
| 10431981 | O17 | 2 | 4 |   |   | 0 | 2 |   |   | 1 | 2 | 3 | 3 | 1 | 1 | 3 | 3 | 1 | 1 | 3 | 3 | 0 | 1 |   |   |
| 10431981 | O18 | 2 | 4 |   |   | 0 | 2 |   |   | 1 | 3 | 2 | 3 | 1 | 1 | 3 | 3 | 1 | 1 | 3 | 3 | 0 | 1 |   |   |
| 10709663 | O19 | 3 | 4 |   |   | 2 | 2 | 2 | 2 | 1 | 2 | 2 | 3 | 2 | 3 | 2 | 2 | 2 | 3 | 2 | 2 | 3 | 3 |   |   |
| 10709663 | O20 | 2 | 4 |   |   |   |   | 2 | 3 |   |   | 1 | 3 |   |   | 2 | 3 |   |   | 2 | 3 |   |   | 2 | 2 |
| 10709663 | O21 | 3 | 4 |   |   | 2 | 3 | 1 | 2 | 1 | 3 | 1 | 3 | 2 | 3 | 2 | 3 | 2 | 3 | 2 | 3 | 2 | 3 | 1 | 2 |
| 10709663 | O22 |   |   | 3 | 4 |   |   | 1 | 3 |   |   | 1 | 3 |   |   | 2 | 3 |   |   | 2 | 3 |   |   | 1 | 2 |
| 10718773 | O23 | 3 | 4 |   |   | 1 | 2 |   |   | 2 | 3 |   |   | 3 | 3 |   |   | 3 | 3 |   |   | 2 | 3 |   |   |
| 10718773 | O24 | 3 | 4 |   |   | 1 | 3 | 1 | 2 | 2 | 3 | 1 | 2 | 3 | 3 | 2 | 3 | 3 | 3 | 2 | 3 | 2 | 3 | 1 | 2 |
| 9815043  | P1  | 3 | 4 |   |   | 2 | 3 | 2 | 3 | 1 | 3 | 1 | 3 | 1 | 3 |   |   | 1 | 3 |   |   | 2 | 3 |   |   |
| 9815043  | P2  |   |   | 3 | 4 |   |   | 1 | 2 |   |   | 1 | 2 |   |   | 2 | 3 |   |   | 2 | 3 |   |   | 1 | 2 |
| 9818278  | P3  | 2 | 3 | 3 | 4 | 2 | 3 | 2 | 3 | 1 | 3 | 2 | 2 | 2 | 3 | 2 | 3 | 2 | 3 | 2 | 3 | 1 | 3 | 1 | 2 |
| 9818278  | P4  | 2 | 3 | 3 | 4 | 1 | 3 | 1 | 2 | 1 | 3 | 1 | 2 | 2 | 3 | 2 | 3 | 2 | 3 | 2 | 3 | 2 | 3 | 2 | 3 |
| 9818278  | P5  | 3 | 4 |   |   | 2 | 3 |   |   | 1 | 3 |   |   | 3 | 3 |   |   | 3 | 3 |   |   | 2 | 3 | 1 | 1 |
| 9818278  | P6  |   |   | 3 | 4 |   |   | 2 | 3 |   |   | 1 | 3 |   |   | 2 | 3 |   |   | 2 | 3 |   |   | 2 | 2 |
| 10003847 | P7  | 3 | 4 |   |   | 3 | 4 |   |   | 3 | 3 |   |   | 3 | 3 |   |   | 3 | 3 |   |   | 3 | 3 |   |   |
| 10003847 | P8  |   |   |   |   |   |   |   |   |   |   |   |   |   |   |   |   |   |   |   |   |   |   | 2 | 3 |
| 10006811 | P9  | 2 | 4 |   |   | 2 | 3 |   |   | 2 | 3 |   |   | 2 | 3 |   |   | 2 | 3 |   |   | 2 | 2 |   |   |
| 10006811 | P10 |   |   |   |   |   |   |   |   |   |   |   |   |   |   |   |   |   |   |   |   | 2 | 3 |   |   |
| 10006811 | P11 | 2 | 4 |   |   | 3 | 4 | 2 | 2 | 2 | 3 | 1 | 1 | 2 | 3 |   |   | 2 | 3 |   |   | 1 | 3 |   |   |
| 10006811 | P12 |   |   | 3 | 4 |   |   | 3 | 3 |   |   | 1 | 3 |   |   | 3 | 3 |   |   | 3 | 3 |   |   | 1 | 2 |
| 10400680 | P13 | 2 | 4 | 2 | 4 | 2 | 3 | 1 | 2 | 2 | 3 | 2 | 2 | 2 | 3 | 2 | 3 | 2 | 3 | 2 | 3 | 1 | 3 | 1 | 3 |
| 10400680 | P14 |   |   | 3 | 4 |   |   | 1 | 3 |   |   | 1 | 2 |   |   | 0 | 2 |   |   | 2 | 3 | 2 | 2 |   |   |
| 10402495 | P15 | 3 | 4 |   |   | 1 | 2 |   |   | 2 | 3 |   |   | 3 | 3 |   |   | 3 | 3 |   |   | 2 | 3 |   |   |
| 10402495 | P16 | 3 | 4 |   |   | 1 | 2 | 1 | 2 | 1 | 2 | 2 | 2 | 3 | 3 |   |   | 3 | 3 |   |   | 2 | 2 |   |   |
| 10402495 | P17 | 3 | 4 |   |   | 2 | 3 |   |   | 1 | 2 |   |   | 3 | 3 |   |   | 3 | 3 |   |   | 2 | 3 |   |   |
| 10402495 | P18 |   |   | 3 | 4 |   |   | 2 | 3 |   |   | 2 | 2 |   |   | 3 | 3 |   |   | 3 | 3 |   |   |   |   |
| 10700693 | P19 | 3 | 4 |   |   | 3 | 3 |   |   | 2 | 3 |   |   | 3 | 3 |   |   | 3 | 3 |   |   | 2 | 2 |   |   |
| 10700693 | P20 |   |   | 2 | 4 | 3 | 3 | 3 | 3 | 2 | 3 | 2 | 3 | 1 | 3 | 2 | 3 | 1 | 3 | 2 | 3 | 1 | 3 | 1 | 3 |
| 10701686 | P21 | 2 | 4 |   |   | 3 | 3 | 3 | 3 | 2 | 3 |   |   | 2 | 3 |   |   | 2 | 3 |   |   | 2 | 2 |   |   |
| 10701686 | P22 | 3 | 4 |   |   | 3 | 4 | 3 | 3 | 3 | 4 | 3 | 3 | 2 | 3 |   |   | 2 | 3 |   |   | 2 | 2 |   |   |
| 10701686 | P23 | 3 | 4 |   |   | 3 | 3 | 3 | 4 | 2 | 4 | 3 | 4 | 2 | 3 |   |   | 2 | 3 |   |   | 2 | 3 |   |   |
| 10701686 | P24 |   |   | 3 | 4 |   |   | 2 | 3 |   |   | 1 | 3 |   |   | 2 | 3 |   |   | 2 | 3 |   |   | 2 | 2 |
| 9740516  | Q1  | 1 | 4 |   |   | 1 | 3 |   |   | 0 | 2 |   |   | 0 | 3 |   |   | 0 | 3 |   |   | 0 | 2 |   |   |
| 9740516  | Q2  | 3 | 4 |   |   | 1 | 3 |   |   | 1 | 3 |   |   | 2 | 3 |   |   | 2 | 3 |   |   | 1 | 3 |   |   |
| 9740516  | Q3  | 3 | 4 |   |   | 2 | 3 |   |   | 1 | 3 |   |   | 1 | 3 |   |   | 1 | 3 |   |   | 1 | 3 |   |   |
| 9740516  | Q4  |   |   | 2 | 4 | 1 | 3 |   |   | 1 | 2 |   |   | 1 | 3 |   |   | 1 | 3 |   |   | 1 | 2 |   |   |
| 9815043  | Q5  | 2 | 4 |   |   | 2 | 2 | 2 | 3 | 2 | 3 | 2 | 3 | 3 | 3 | 3 | 3 | 3 | 3 | 3 | 3 | 1 | 3 |   |   |
| 9815043  | Q6  | 2 | 4 |   |   | 2 | 3 |   |   | 1 | 3 |   |   | 3 | 3 |   |   | 3 | 3 |   |   | 1 | 3 |   |   |
| 9940301  | Q7  | 4 |   |   |   | 1 | 2 |   |   | 3 | 4 |   |   | 1 | 2 |   |   | 3 | 3 |   |   | 3 | 3 |   |   |
| 9940301  | Q8  | 4 |   |   |   | 1 | 2 |   |   | 3 | 4 |   |   | 3 | 3 |   |   | 3 | 3 |   |   | 3 | 3 |   |   |
| 9940301  | Q9  | 4 |   |   |   | 1 | 2 |   |   | 3 | 4 |   |   | 1 | 2 |   |   | 3 | 3 |   |   | 3 | 3 |   |   |
| 9940301  | Q10 |   |   | 4 |   |   |   | 1 | 3 |   |   | 2 | 3 |   |   | 3 | 3 |   |   | 3 | 3 |   |   | 2 | 3 |
| 10003847 | Q11 | 4 |   |   |   | 2 | 3 | 1 | 2 | 3 | 3 | 1 | 2 | 3 | 3 | 3 | 3 | 3 | 3 | 3 | 3 | 2 | 3 | 1 | 3 |

|          |     |   |   |   |   |   |   |   |   |   |   |   |   |   |   |   |   |   |   |   |   |   |   |   |   |   |
|----------|-----|---|---|---|---|---|---|---|---|---|---|---|---|---|---|---|---|---|---|---|---|---|---|---|---|---|
| 10003847 | Q12 |   |   |   |   |   |   |   |   |   |   |   |   |   |   |   |   |   |   |   | 3 | 3 | 1 | 1 |   |   |
| 10345627 | Q13 | 4 |   |   |   | 2 | 2 |   |   | 2 | 3 |   |   | 3 | 3 |   |   | 3 | 3 |   |   | 2 | 2 |   |   |   |
| 10345627 | Q14 | 3 | 4 |   |   | 2 | 3 |   |   | 3 | 3 |   |   |   | 2 | 3 |   |   | 2 | 3 |   | 2 | 3 |   |   |   |
| 10345627 | Q15 | 3 | 4 |   |   | 2 | 3 |   |   | 3 | 3 |   |   | 3 | 3 |   |   | 3 | 3 |   |   | 2 | 3 |   |   |   |
| 10345627 | Q16 |   |   | 3 | 4 |   |   | 2 | 3 |   |   | 1 | 3 |   |   | 2 | 3 |   |   | 2 | 3 |   |   | 2 | 2 |   |
| 10400680 | Q17 | 3 | 4 |   |   |   |   | 2 | 3 |   |   | 1 | 3 |   |   | 2 | 3 |   |   | 2 | 3 |   |   | 1 | 3 |   |
| 10400680 | Q18 | 2 | 4 |   |   | 1 | 2 | 2 | 3 | 0 | 3 | 1 | 3 | 0 | 1 | 2 | 3 | 0 | 1 | 2 | 3 |   |   | 2 | 3 |   |
| 10639881 | Q19 | 2 | 3 |   |   | 1 | 3 |   |   | 1 | 3 | 2 | 2 | 1 | 3 | 2 | 3 | 1 | 3 | 2 | 3 | 1 | 3 | 1 | 3 |   |
| 10639881 | Q20 | 3 | 4 |   |   | 1 | 3 | 1 | 3 | 3 | 4 | 2 | 3 | 2 | 3 | 2 | 3 | 2 | 3 | 2 | 3 | 1 | 3 | 1 | 3 |   |
| 10639881 | Q21 | 3 | 4 |   |   | 1 | 3 |   |   | 1 | 3 |   |   |   | 3 | 3 |   |   | 3 | 3 |   |   | 3 | 3 | 1 | 2 |
| 10639881 | Q22 |   |   | 2 | 3 | 1 | 1 | 2 |   |   |   | 2 | 2 |   |   | 1 | 3 |   |   | 1 | 3 |   |   | 1 | 2 |   |
| 10700693 | Q23 | 3 | 4 |   |   | 3 |   |   |   | 3 | 3 |   |   | 3 | 3 |   |   | 3 | 3 |   |   | 1 | 2 |   |   |   |
| 10700693 | Q24 | 3 | 4 |   |   | 3 |   |   |   | 2 | 3 |   |   | 3 | 3 |   |   | 3 | 3 |   |   | 1 | 3 |   |   |   |

CA: Prostate carcinoma; BE: benign tissue. The intensities are given as 0=no staining, 1=weak, 2=moderate, 3=strong, 4=very strong. Low=lowest staining intensity of a tissue punch. High= highest staining intensity of a tissue punch.

Supplementary table 1B: Mean staining intensities and clinical data

| Tumor    | VDAC1 |     | NDUF54 |     | SDHA |     | UQCRC2 |     | MT-CO1 |     | ATP5F1A |     | Age at diagnosis [years] | Age at radical prostatectomy [years] | Gleason score | Gleason pattern 1 at RPE | Gleason pattern 2 at RPE | Resection border; 0=without tumor, 1=tumor positive | Tumor stage at RPE | Prostate volume at RPE | PSA levels at diagnosis | fPSA% at diagnosis | PSA progression | Time to PSA progression |
|----------|-------|-----|--------|-----|------|-----|--------|-----|--------|-----|---------|-----|--------------------------|--------------------------------------|---------------|--------------------------|--------------------------|-----------------------------------------------------|--------------------|------------------------|-------------------------|--------------------|-----------------|-------------------------|
|          | CA    | BE  | CA     | BE  | CA   | BE  | CA     | BE  | CA     | BE  | CA      | BE  |                          |                                      |               |                          |                          |                                                     |                    |                        |                         |                    |                 |                         |
| 9740516  | 3.2   | 3.0 | 2.1    | 1.6 | 2.0  | 2.0 | 2.0    | 2.0 | 2.0    | 2.0 | 1.8     |     | 67                       | 67                                   | 5             | 2                        | 3                        | 0                                                   | 2b                 | 47                     | 8.5                     | 14.6               | unknown         | 0                       |
| 9815043  | 3.2   | 3.5 | 2.3    | 2.2 | 2.2  | 2.0 | 2.7    | 2.8 | 2.7    | 2.8 | 2.2     | 1.5 | 68                       | 69                                   | 6             | 3                        | 3                        | 0                                                   | 2b                 | 26                     | 7.3                     | 12.6               | unknown         | 0                       |
| 9818278  | 2.8   | 3.5 | 2.3    | 2.2 | 2.0  | 1.8 | 2.7    | 2.5 | 2.7    | 2.5 | 2.3     | 1.8 | 53                       | 53                                   | 7             | 3                        | 4                        | 0                                                   | 2a                 | 24.5                   | 2.2                     | 10.5               | no              | 0                       |
| 9823060  | 3.5   |     | 2.5    | 2.4 | 2.0  | 1.8 | 2.5    | 2.4 | 2.5    | 2.4 | 2.5     | 1.9 | 57                       | 57                                   | 5             | 2                        | 3                        | 0                                                   | 2c                 | 20                     | 2.6                     | 12.3               | no              | 0                       |
| 9823371  | 3.7   | 3.5 | 2.5    | 2.8 | 2.5  | 2.8 | 2.5    | 2.8 | 2.5    | 2.8 | 3.0     | 2.5 | 55                       | 55                                   | 8             | 4                        | 4                        | 0                                                   | 2b                 | 25                     | 7.4                     | 7.6                | unknown         | 0                       |
| 9826099S | 3.3   | 3.5 | 2.0    | 1.5 | 2.0  | 1.3 | 2.0    | 2.7 | 2.0    | 2.7 |         | 2.2 | 57                       | 58                                   | 5             | 3                        | 2                        | 0                                                   | 2c                 | 25                     | 7.9                     | 8.7                | unknown         | 0                       |
| 9827917  | 3.7   |     | 2.7    | 1.8 | 2.5  | 1.0 | 2.5    | 2.0 | 2.5    | 1.5 | 3.0     | 2.2 | 69                       | 69                                   | 6             | 3                        | 3                        | 0                                                   | 3a                 | 26                     | 6.8                     | 16.3               | unknown         | 0                       |
| 9828722  | 3.5   | 3.0 | 0.5    | 1.0 | 2.5  | 2.0 | 2.0    | 2.0 | 2.0    | 2.0 |         | 2.0 | 56                       | 56                                   | 6             | 3                        | 3                        | 0                                                   | 3a                 | 17                     | 3.1                     | 4.5                | noRad           | 0                       |
| 9832436  | 3.7   |     | 1.3    | 1.5 | 2.2  | 1.5 | 3.0    | 2.0 | 3.0    | 2.0 | 3.0     | 2.0 | 52                       | 52                                   | 6             | 3                        | 3                        | 0                                                   | 2b                 | 20                     | 2.9                     | 15.2               | unknown         | 0                       |
| 9832588  | 3.3   |     | 2.5    |     | 2.0  | 2.5 | 2.5    | 1.5 | 2.5    | 1.5 | 2.7     | 1.5 | 57                       | 58                                   | 7             | 4                        | 3                        | 0                                                   | 2c                 | 50                     | 12.4                    | 14.9               | no              | 0                       |
| 9832740S | 3.8   | 3.5 | 2.0    | 1.8 | 2.8  | 1.5 | 3.0    | 1.3 | 3.0    | 1.3 | 3.0     | 1.8 | 59                       | 59                                   | 7             | 3                        | 4                        | 0                                                   | 3a                 | 20                     | 2.1                     | 16                 | noRad           | 0                       |
| 9838248  | 3.7   |     | 2.5    | 2.3 | 1.8  | 2.0 | 2.2    | 2.5 | 2.2    | 2.5 | 1.5     | 2.2 | 54                       | 54                                   | 6             | 3                        | 3                        | 0                                                   | 2c                 | 17                     | 7.8                     | 10                 | no              | 0                       |
| 9839857  | 3.8   |     | 1.8    | 2.3 | 2.3  | 1.8 | 2.8    | 2.5 | 2.8    | 2.5 | 2.5     | 2.2 | 67                       | 68                                   | 6             | 3                        | 3                        | 0                                                   | 2c                 | 17                     | 4.1                     | 13.7               | no              | 0                       |
| 9841708  | 3.3   | 3.5 | 2.2    | 1.5 | 2.2  | 1.8 | 2.3    | 1.5 | 2.3    | 1.5 | 3.0     | 2.5 | 72                       | 73                                   | 7             | 3                        | 4                        | 0                                                   | 3a                 | 22                     | 4.6                     | 16.5               | unknown         | 0                       |
| 9842434  |       | 3.5 | 2.2    | 2.5 | 2.3  | 2.0 | 3.0    | 2.5 | 3.0    | 2.5 | 3.0     | 2.5 | 57                       | 57                                   | 5             | 2                        | 3                        | 0                                                   | 2b                 | 40                     | 6.2                     | 13.2               | no              | 0                       |
| 9901036  |       |     | 2.8    | 2.5 | 3.0  | 3.0 | 3.0    | 2.5 | 3.0    | 2.5 | 2.8     | 2.5 | 52                       | 52                                   | 6             | 3                        | 3                        | 0                                                   | 2c                 | 28                     | 3.6                     | 13.9               | yes             | 3676                    |
| 9901335  | 3.5   | 3.5 | 2.5    | 2.0 | 2.5  | 1.8 | 1.5    | 1.7 | 2.3    | 1.8 | 2.0     | 1.5 | 57                       | 57                                   | 5             | 2                        | 3                        | 0                                                   | 2b                 | 31                     | 8.2                     | 11.2               | no              | 0                       |
| 9901797  | 3.2   |     | 2.5    | 2.5 | 2.0  | 2.5 | 2.5    | 2.5 | 2.5    | 2.5 | 2.0     | 3.0 | 55                       | 55                                   | 6             | 3                        | 3                        | 1                                                   | 2c                 | 28.5                   | 8.3                     | 6.3                | no              | 0                       |
| 9902802  | 3.7   |     | 2.3    | 2.2 | 2.2  | 1.3 | 2.3    | 1.5 | 2.3    | 1.5 | 2.5     | 1.3 | 50                       | 50                                   | 7             | 3                        | 4                        | 0                                                   | 2c                 | 18                     | 8.5                     | 3.4                | unknown         | 0                       |
| 9908111  | 3.5   | 2.5 | 2.8    | 1.5 | 2.3  | 0.8 | 2.0    | 2.0 | 2.5    | 2.3 | 2.0     | 1.5 | 54                       | 54                                   | 5             | 3                        | 2                        | 0                                                   | 2c                 | 30                     | 4.2                     | 21.7               | unknown         | 0                       |
| 9909768  | 3.8   | 3.5 | 2.3    | 2.2 | 3.0  | 1.8 | 2.8    |     | 2.8    |     | 2.3     | 2.0 | 48                       | 48                                   | 6             | 3                        | 3                        | 0                                                   | 2a                 | 22                     | 2                       | 9.5                | no              | 0                       |
| 9916972  | 3.5   | 3.5 | 3.0    | 2.5 | 2.0  | 2.0 | 2.3    | 2.5 | 2.5    |     | 2.5     | 2.5 | 49                       | 50                                   | 5             | 2                        | 3                        | 0                                                   | 2b                 | 40                     | 4.5                     | 13.1               | no              | 0                       |
| 9932197  | 3.5   | 3.5 | 2.5    | 2.3 | 2.0  | 1.5 | 2.5    | 2.4 | 2.5    | 2.5 | 2.5     | 2.5 | 60                       | 61                                   | 5             | 3                        | 2                        | 0                                                   | 2c                 | n.a.                   | 5.8                     | 15                 | no              | 0                       |
| 9935954  | 3.1   |     | 2.5    | 1.5 | 1.5  | 1.8 | 1.8    | 1.5 | 2.4    |     | 2.5     | 2.5 | 64                       | 65                                   | 6             | 3                        | 3                        | 0                                                   | 2a                 | 42                     | 2.1                     | 17.6               | unknown         | 0                       |
| 9940301  |       |     | 1.5    | 2.0 | 3.5  | 2.5 | 2.0    | 3.0 | 3.0    | 3.0 | 3.0     | 2.5 | 68                       | 68                                   | 8             | 3                        | 5                        | 0                                                   | 2b                 | 20                     | 44.55                   | n.a.               | yes             | 351                     |
| 10003847 | 3.8   |     | 3.0    | 1.5 | 3.0  | 1.5 | 3.0    | 3.0 | 3.0    | 3.0 | 2.8     | 1.8 | 57                       | 57                                   | 7             | 3                        | 4                        | 0                                                   | 2c                 | 24.8                   | 8.2                     | 12                 | no              | 0                       |
| 10006811 | 3.0   | 3.5 | 3.0    | 2.5 | 2.5  | 1.5 | 2.5    | 3.0 | 2.5    | 3.0 | 2.2     | 1.5 | 49                       | 49                                   | 6             | 3                        | 3                        | 0                                                   | 2c                 | 16.9                   | 4.3                     | 7                  | no              | 0                       |
| 10015784 | 3.7   | 3.5 | 3.2    | 3.0 | 3.0  | 2.8 | 2.8    | 2.5 | 2.8    | 2.5 | 3.0     | 2.8 | 68                       | 68                                   | 7             | 3                        | 4                        | 1                                                   | 3a                 | 30                     | 5.8                     | 11.9               | no              | 0                       |
| 10022186 | 3.5   |     | 2.8    | 3.0 | 2.8  | 2.5 | 3.0    | 2.5 | 3.0    |     | 3.0     | 2.5 | 52                       | 52                                   | 7             | 3                        | 4                        | 0                                                   | 2a                 | 18                     | 6                       | 9                  | no              | 0                       |
| 10027530 | 3.0   | 3.0 | 1.7    | 2.2 | 1.8  | 1.8 | 2.5    | 2.3 | 2.5    | 2.3 | 2.3     | 2.5 | 59                       | 59                                   | 7             | 3                        | 4                        | x                                                   | 2c                 | 27                     | 9                       | 9.7                | no              | 0                       |
| 10038130 | 3.5   | 3.5 | 2.0    | 1.5 | 1.8  | 2.0 | 2.2    |     | 2.2    |     | 1.8     | 2.0 | 62                       | 62                                   | 5             | 2                        | 3                        | 0                                                   | 2c                 | n.a.                   | 5.4                     | 12                 | no              | 0                       |
| 10115487 | 3.5   |     | 1.7    | 1.3 | 1.5  | 1.3 | 2.5    | 2.5 | 2.5    | 2.5 | 2.3     | 2.3 | 56                       | 56                                   | 5             | 2                        | 3                        | 0                                                   | 3a                 | 30                     | 5.03                    | 11.4               | unknown         | 0                       |
| 10134427 | 3.5   |     | 2.2    | 1.7 | 2.3  | 2.0 | 2.5    | 2.5 | 2.5    | 2.5 | 2.8     | 1.8 | 62                       | 62                                   | 7             | 3                        | 4                        | 0                                                   | 2c                 | n.a.                   | 5.4                     | 0                  | no              | 0                       |
| 10136806 | 3.8   |     | 2.2    | 1.5 | 1.7  | 1.5 | 2.5    | 2.3 | 3.0    | 2.5 | 2.5     | 1.5 | 55                       | 56                                   | 6             | 3                        | 3                        | 0                                                   | 2a                 | 25                     | 2.8                     | 15                 | no              | 0                       |
| 10203428 | 3.7   |     | 2.5    | 2.5 | 2.2  | 2.0 | 2.5    | 2.5 | 2.5    | 2.5 | 2.5     | 2.0 | 58                       | 58                                   | 7             | 4                        | 3                        | 0                                                   | 2c                 | 21                     | 14.6                    | 6.8                | no              | 0                       |
| 10204696 | 3.8   | 3.0 | 2.5    | 1.5 | 2.8  | 1.3 | 2.5    | 2.5 | 2.5    | 2.5 | 2.5     | 1.5 | 60                       | 60                                   | 7             | 4                        | 3                        | 0                                                   | 2c                 | 29                     | 2.5                     | 14                 | no              | 0                       |
| 10212172 | 3.5   | 3.5 | 1.3    | 2.5 | 2.0  | 2.5 | 2.0    | 2.5 | 2.0    | 2.5 | 2.0     | 2.0 | 65                       | 65                                   | 6             | 3                        | 3                        | 0                                                   | 2b                 | 36.6                   | 5.5                     | 23.8               | unknown         | 0                       |
| 10213893 | 3.7   |     | 2.3    | 2.3 | 2.7  | 2.3 | 2.5    | 2.8 | 2.5    | 2.8 | 2.5     | 2.5 | 55                       | 55                                   | 5             | 3                        | 2                        | 0                                                   | 2c                 | 46                     | 3.3                     | 12                 | no              | 0                       |
| 10217220 | 3.5   | 3.5 | 2.5    | 2.5 | 2.2  | 2.0 | 3.0    | 2.0 | 3.0    | 2.0 | 2.5     |     | 72                       | 72                                   | 7             | 3                        | 4                        | 1                                                   | 2b                 | 21                     | 7.79                    | 16.8               | yes             | 2093                    |
| 10217305 | 2.8   | 3.5 | 2.0    | 2.5 | 2.0  | 2.0 | 2.5    |     | 2.5    |     |         | 2.5 | 63                       | 63                                   | 6             | 3                        | 3                        | 0                                                   | 2b                 | 28                     | 6.28                    | 6.1                | no              | 0                       |
| 10238998 | 3.0   |     | 1.5    | 2.0 | 1.5  | 2.0 |        | 2.2 |        | 2.2 | 2.0     | 2.5 | 51                       | 52                                   | 6             | 3                        | 3                        | 0                                                   | 2c                 | 36                     | 2.04                    | 13.2               | no              | 0                       |
| 10239551 | 3.7   |     | 1.8    | 2.0 | 2.3  | 2.0 | 2.5    | 2.5 | 2.5    | 2.5 | 2.3     | 2.3 | 57                       | 57                                   | 8             | 3                        | 5                        | 0                                                   | 2a                 | 35                     | 3.68                    | 12                 | no              | 0                       |
| 10239624 | 3.3   |     | 2.7    | 2.5 | 1.8  | 2.0 | 2.3    | 2.5 | 2.3    | 2.5 | 2.0     | 1.5 | 67                       | 68                                   | 5             | 2                        | 3                        | 0                                                   | 2c                 | 75                     | 16.45                   | 23.7               | no              | 0                       |
| 10310392 | 3.8   |     | 2.5    | 2.0 | 3.2  | 1.5 | 2.7    | 3.0 | 2.7    | 3.0 | 2.5     | 2.0 | 56                       | 57                                   | 7             | 3                        | 4                        | 1                                                   | 2c                 | 30                     | 1.85                    | 15.1               | no              | 0                       |
| 10311955 | 3.5   | 2.5 | 2.4    | 2.5 | 2.9  | 2.5 | 3.0    | 2.5 | 3.0    | 2.5 | 2.5     | 2.0 | 61                       | 61                                   | 7             | 3                        | 4                        | 1                                                   | 2b                 | 26                     | 5.16                    | 8.7                | no              | 0                       |
| 10325091 | 3.5   |     | 2.2    | 2.5 | 2.8  | 2.0 | 2.3    | 2.8 | 2.5    | 2.5 | 3.0     | 2.5 | 58                       | 59                                   | 8             | 3                        | 5                        | 0                                                   | 3a                 | 24                     | 2.31                    | 15.6               | no              | 0                       |
| 10338726 | 3.5   | 3.5 | 1.5    | 2.3 | 2.5  | 1.8 | 2.3    | 2.5 | 1.9    | 2.2 | 2.0     | 2.3 | 56                       | 56                                   | 6             | 3                        | 3                        | 0                                                   | 2c                 | 23                     | 3.19                    | 12.5               | no              | 0                       |
| 10343434 | 3.5   | 3.5 | 2.5    | 2.3 | 2.7  | 2.3 | 2.7    | 2.5 | 2.5    | 2.3 | 2.5     | 1.5 | 55                       | 55                                   | 7             | 3                        | 4                        | 0                                                   | 2c                 | 35                     | 3.15                    | 12.1               | unknown         | 0                       |
| 10345627 | 3.7   | 3.5 | 2.3    | 2.5 | 2.8  | 2.0 | 3.0    | 2.5 | 3.0    | 2.5 | 2.3     | 2.0 | 52                       | 52                                   | 5             | 3                        | 2                        | 0                                                   | 2a                 | 33                     | 4.9                     | 13                 | no              | 0                       |
| 10400680 | 3.2   | 3.3 | 2.0    | 2.1 | 2.0  | 1.9 | 1.5    | 2.0 | 1.5    | 2.5 | 2.0     | 2.2 | 61                       | 61                                   | 5             | 3                        | 2                        | 0                                                   | 2c                 | 80                     | 9.24                    | 17.2               | no              | 0                       |
| 10402495 | 3.5   | 3.5 | 1.8    | 2.0 | 1.8  | 2.0 | 3.0    | 3.0 | 3.0    | 3.0 | 2.3     |     | 60                       | 61                                   | 6             | 3                        | 3                        | 1                                                   | 2c                 | 50                     | 10.78                   | 7.1                | no              | 0                       |
| 10426270 | 3.2   | 3.5 | 2.2    | 2.3 | 2.0  | 2.3 |        | 3.0 |        | 3.0 |         | 2.0 | 64                       | 65                                   | 8             | 3                        | 5                        | 0                                                   | 2c                 | 30                     | 7.61                    | 11                 | no              | 0                       |
| 10431981 | 3.2   |     | 1.2    | 2.5 | 2.2  | 2.8 | 1.7    | 3.0 | 1.7    | 3.0 | 1.0     | 2.5 | 58                       | 58                                   | 8             | 3                        | 5                        | 0                                                   | 2c                 | 24                     | 4.63                    | 6.5                | no              | 0                       |
| 10433224 | 3.7   | 3.5 | 2.8    | 1.3 | 2.8  | 2.3 | 2.8    | 2.5 | 2.8    | 2.5 | 2.5     | 1.3 | 59                       | 59                                   | 6             | 3                        | 3                        | 0                                                   | 2a                 | 28                     | 4.21                    | 12.1               | no              | 0                       |
| 10443208 | 3.5   | 3.5 |        | 1.3 |      | 1.8 |        | 2.8 |        | 2.8 |         | 2.3 | 58                       | 59                                   | 6             | 3                        | 3                        | 0                                                   | 2c                 | 60                     | 6.44                    | 11.3               | unknown         | 0                       |

|          |     |     |     |     |     |     |     |     |     |     |     |     |    |    |   |   |   |   |    |      |       |       |         |      |
|----------|-----|-----|-----|-----|-----|-----|-----|-----|-----|-----|-----|-----|----|----|---|---|---|---|----|------|-------|-------|---------|------|
| 10511812 | 3,5 |     | 1,8 | 2,0 | 1,8 | 2,5 | 3,0 | 2,0 | 3,0 | 2,0 | 3,0 | 2,0 | 70 | 71 | 9 | 5 | 4 | 0 | 3a | 30   | 8,23  | 17,7  | yes     | 435  |
| 10512852 | 3,1 | 3,5 | 2,5 | 2,0 | 2,7 | 2,2 | 2,3 | 2,0 | 2,3 | 2,0 | 2,3 | 2,0 | 56 | 56 | 7 | 4 | 3 | 1 | 2c | 30   | 6,66  | 15,5  | yes     | 1319 |
| 10513260 | 3,5 | 3,0 | 2,0 | 0,5 | 2,8 | 1,5 | 2,5 | 1,5 | 2,5 | 1,5 | 2,5 | 1,5 | 65 | 66 | 8 | 5 | 3 | 0 | 2c | 20   | 4,63  | 8,2   | no      | 0    |
| 10514489 | 3,7 | 3,0 | 2,5 | 2,0 | 2,7 | 1,7 | 2,3 | 2,0 | 2,3 | 2,0 | 2,5 | 2,6 | 61 | 61 | 8 | 3 | 5 | 0 | 2c | 34   | 2,52  | 10,6  | no      | 0    |
| 10529151 | 3,0 | 3,5 | 2,1 |     | 2,3 | 1,5 | 2,4 |     | 2,6 |     | 1,6 |     | 56 | 56 | 7 | 3 | 4 | 0 | 2b | 33   | 29,2  | 8     | unknown | 0    |
| 10601619 | 3,7 |     | 2,8 | 2,3 | 2,3 | 2,5 | 2,5 | 2,5 | 2,5 | 2,5 | 2,5 | 2,3 | 67 | 67 | 7 | 3 | 4 | 1 | 2c | 30   | 7,11  | 10,1  | no      | 0    |
| 10604940 | 3,8 | 3,5 | 3,0 |     | 2,9 |     | 3,0 | 2,5 | 3,0 | 2,5 | 2,8 | 2,0 | 71 | 71 | 7 | 3 | 4 | 0 | 2c | 62   | 6,19  | 15,5  | no      | 0    |
| 10606082 | 3,7 |     | 2,7 | 2,8 | 1,7 | 2,5 | 2,5 | 2,5 | 2,5 | 2,5 | 2,5 | 1,8 | 57 | 57 | 8 | 3 | 5 | 1 | 2c | 30   | 6,28  | 12    | no      | 0    |
| 10607452 | 3,3 | 3,5 | 2,5 | 2,5 | 1,7 | 1,5 |     | 2,0 |     | 2,0 |     | 2,0 | 64 | 64 | 6 | 3 | 3 | 0 | 2c | 35   | 4,27  | 15    | no      | 0    |
| 10613128 |     |     | 3,7 | 2,5 | 3,5 | 2,0 | 2,5 | 2,5 | 2,5 | 2,5 | 2,8 | 2,5 | 62 | 62 | 9 | 4 | 5 | 1 | 2c | 42   | 3,46  | 28,3  | yes     | 1087 |
| 10622130 | 3,7 | 3,0 | 2,7 | 2,2 | 2,0 | 2,5 | 2,8 | 2,5 | 2,8 | 2,5 | 2,3 | 2,0 | 59 | 60 | 5 | 3 | 2 | 0 | 2c | 28,5 | 4,84  | 13    | no      | 0    |
| 10624826 | 3,7 | 3,5 | 3,3 | 2,0 | 1,5 | 1,5 | 2,5 | 2,5 | 2,5 | 2,5 | 2,5 | 1,5 | 67 | 67 | 9 | 4 | 5 | 0 | 2c | 30   | 9,1   | 8     | yes     | 894  |
| 10625132 | 3,8 | 3,5 | 2,8 | 2,7 | 2,5 | 2,3 | 2,5 | 2,5 | 2,5 | 2,5 | 2,5 | 2,5 | 67 | 67 | 5 | 3 | 2 | 0 | 2c | 40   | 9,03  | 14,5  | no      | 0    |
| 10627970 | 2,8 | 3,0 | 3,3 | 2,5 | 2,8 | 1,8 | 2,5 | 2,5 | 2,5 | 2,5 | 2,5 | 1,8 | 70 | 70 | 7 | 3 | 4 | 0 | 2c | 30   | 5,8   | 5,8   | unknown | 0    |
| 10630526 | 3,5 | 3,5 | 2,8 | 2,8 | 3,3 | 2,8 | 2,5 |     | 2,5 |     | 2,5 | 2,5 | 66 | 66 | 7 | 3 | 4 | 0 | 3b | 40   | 16,9  | 0     | unknown | 0    |
| 10631521 | 3,3 | 3,5 | 2,8 | 2,5 | 2,5 | 2,3 | 2,5 | 2,8 | 2,5 | 2,5 | 2,5 | 2,5 | 60 | 61 | 6 | 3 | 3 | 0 | 2c | 30   | 3,5   | 15,3  | no      | 0    |
| 10637255 | 3,5 | 2,5 | 2,7 | 2,5 | 1,8 | 1,5 | 2,6 | 2,5 | 2,5 | 2,5 | 2,5 | 2,5 | 63 | 63 | 7 | 3 | 4 | 1 | 2c | 42   | 3,77  | 17    | yes     | 970  |
| 10639881 | 3,2 | 2,5 | 1,8 | 2,3 | 2,5 | 2,2 | 2,5 | 2,3 | 2,5 | 2,3 | 2,3 | 1,8 | 64 | 64 | 6 | 3 | 3 | 0 | 2c | 41   | 3,64  | 14    | unknown | 0    |
| 10700693 | 3,5 | 3,0 | 3,0 | 3,0 | 2,6 | 2,5 | 2,8 | 2,5 | 2,8 | 2,5 | 1,9 | 2,0 | 57 | 57 | 5 | 3 | 2 | 0 | 2c | 30   | 4,88  | 11,6  | no      | 0    |
| 10701686 | 3,3 | 3,5 | 3,2 | 3,0 | 3,0 | 2,8 | 2,5 | 2,5 | 2,5 | 2,5 | 2,2 | 2,0 | 67 | 67 | 9 | 4 | 5 | 0 | 3a | 20   | 6,91  | 6,1   | no      | 0    |
| 10709663 | 3,3 | 3,5 | 2,3 | 2,0 | 1,8 | 2,1 | 2,5 | 2,4 | 2,5 | 2,4 | 2,8 | 1,7 | 65 | 65 | 9 | 4 | 5 | 0 | 3a | 38,9 | 2,65  | 17,1  | no      | 0    |
| 10718773 | 3,5 | 3,5 | 1,3 | 1,5 | 2,8 | 2,0 | 3,0 | 2,5 | 3,0 | 2,5 | 2,5 | 1,5 | 66 | 67 | 7 | 4 | 3 | 0 | 3a | 25   | 6,1   | 20,1  | yes     | 1261 |
| 10720178 | 3,5 | 3,5 | 2,3 | 1,8 | 2,5 | 2,5 | 2,5 | 2,5 | 2,5 | 2,5 | 2,3 | 2,0 | 59 | 60 | 7 | 3 | 4 | 0 | 2c | 28   | 3,21  | 8,1   | no      | 0    |
| 10725463 |     |     | 2,8 | 1,3 | 3,5 | 1,5 | 2,5 | 2,0 | 2,5 | 2,0 | 3,0 | 2,0 | 70 | 70 | 5 | 3 | 2 | 0 | 2a | 30   | 3,18  | 11,2  | no      | 0    |
| 10726179 | 3,5 | 3,5 | 2,8 |     | 2,2 |     | 2,5 | 2,5 | 2,6 | 2,5 | 2,3 |     | 51 | 52 | 9 | 5 | 4 | 1 | 3b | 30   | 15,2  | 12    | yes     | 153  |
| 10726359 | 3,5 | 3,5 | 2,8 | 3,2 | 2,5 | 2,5 | 2,2 | 2,5 | 2,2 | 2,5 | 2,2 | 2,3 | 57 | 57 | 7 | 3 | 4 | 1 | 2c | 47   | 9,85  | 7,6   | yes     | 513  |
| 10726906 | 3,8 | 3,5 | 2,0 | 1,8 | 2,8 | 1,8 | 2,0 | 2,4 | 1,0 | 2,5 | 3,0 | 1,9 | 67 | 68 | 5 | 3 | 2 | 0 | 2c | 63   | 7,27  | 39,9  | no      | 0    |
| 10727106 | 3,7 |     | 2,9 |     | 2,3 | 3,0 | 2,8 | 2,5 | 2,2 | 2,5 | 2,2 | 2,5 | 65 | 66 | 9 | 5 | 4 | 1 | 3b | 80   | 8,6   | 0     | yes     | 63   |
| 10728457 | 3,5 | 3,5 | 3,5 | 2,5 | 3,0 | 2,5 | 2,5 | 2,5 | 2,5 | 2,5 | 2,3 | 2,5 | 67 | 68 | 7 | 3 | 4 | 0 | 3a | 30   | 5,52  | 13    | no      | 0    |
| 10729632 | 3,8 | 3,5 | 3,5 | 1,0 | 2,8 | 1,5 | 2,8 | 2,0 | 2,8 | 2,0 | 3,0 | 0,5 | 64 | 65 | 7 | 3 | 4 | 1 | 2c | 30   | 5,63  | 15,1  | no      | 0    |
| 10729892 | 3,7 | 3,5 | 2,8 | 3,3 | 2,5 | 2,0 | 2,5 | 2,5 | 2,5 | 2,5 | 2,4 | 1,8 | 69 | 69 | 7 | 4 | 3 | 1 | 3a | 30   | 3,39  | 12    | yes     | 414  |
| 10732505 | 3,5 | 3,5 | 3,2 | 3,0 | 2,5 | 2,0 | 2,3 | 2,5 | 2,3 | 2,5 | 2,5 | 0,5 | 62 | 63 | 7 | 3 | 4 | 1 | 2c | n.a. | 7,24  | 0     | unknown | 0    |
| 10734364 | 3,5 | 3,5 | 2,3 | 1,8 | 3,5 | 2,8 | 2,6 | 1,5 | 2,6 | 1,5 | 3,0 | 2,0 | 60 | 60 | 7 | 3 | 4 | 1 | 3a | 25   | 6,45  | 9,9   | unknown | 0    |
| 10736608 | 3,5 | 3,0 | 2,3 | 1,8 | 2,8 | 2,0 | 2,3 | 2,5 | 2,3 | 2,5 | 2,3 | 2,0 | 65 | 65 | 7 | 3 | 4 | 0 | 3a | 35   | 7,9   | 0     | unknown | 0    |
| 10811752 | 3,5 | 3,0 | 3,2 | 2,5 | 3,0 | 1,5 | 2,5 | 2,0 | 2,5 | 2,0 | 2,5 | 2,0 | 67 | 68 | 8 | 4 | 4 | 1 | 3b | 50   | 20,75 | 10,46 | noMed   | 0    |
| 10812983 | 3,8 |     | 3,2 | 3,0 | 2,5 | 3,0 | 2,5 | 2,5 | 2,5 | 2,5 | 2,5 | 2,0 | 67 | 67 | 9 | 5 | 4 | 0 | 3b | 28   | 5,9   | 15    | no      | 0    |
| 10817500 | 3,7 | 3,5 | 3,3 | 3,3 | 3,3 | 2,5 | 2,5 | 2,8 | 2,2 | 2,3 | 2,8 | 2,5 | 72 | 72 | 9 | 4 | 5 | 1 | 3b | 40   | 18,09 | 8,96  | unknown | 0    |
| 10821594 | 3,5 |     | 2,7 | 2,5 | 2,8 | 0,8 | 2,0 | 2,0 | 2,0 | 2,0 | 2,5 | 2,0 | 50 | 51 | 9 | 5 | 4 | 0 | 2c | 25   | 6,9   | 5,22  | unknown | 0    |
| 10904082 | 3,2 | 2,5 | 2,3 | 2,7 | 3,5 | 2,0 | 2,5 | 2,5 | 2,5 | 2,5 | 2,5 | 2,5 | 59 | 59 | 8 | 3 | 5 | 0 | 2c | 50   | 4,4   | 10    | unknown | 0    |

Mean staining intensities of tumors (CA) and benign tissue (BE). n.a. = not available; noRAD = no PSA progression, patient received immediately after the radical prostatectomy a radiation therapy. It was indicated when the tumor had a high Gleason score and high risk of progression. noMED = no PSA Progression, same as noRAD with drug therapy (often short androgen withdrawal); RPE = radical prostatectomy; PSA = prostate specific antigen; fPSA% = percent free PSA compared to total PSA.

**Supplementary table 2:** Comparison of the expression of the OXPPOS subunits and VDAC1 in benign prostate hyperplasia and carcinomas in different Gleason scores

| <b>VDAC1</b>    |                    |       |    |                  |       |         |    |
|-----------------|--------------------|-------|----|------------------|-------|---------|----|
|                 | <b>Hyperplasia</b> |       |    | <b>Carcinoma</b> |       |         |    |
|                 | mean               | SEM   | n  | mean             | SEM   | p value | n  |
| Gleason score 5 | 3.307              | 0.084 | 14 | 3.512            | 0.045 | 0.0316  | 17 |
| Gleason score 6 | 3.385              | 0.083 | 13 | 3.419            | 0.065 | 0.7467  | 21 |
| Gleason score 7 | 3.333              | 0.065 | 24 | 3.488            | 0.050 | 0.0605  | 32 |
| Gleason score 8 | 3.083              | 0.154 | 6  | 3.490            | 0.069 | 0.0153  | 10 |
| Gleason score 9 | 3.500              | 0.000 | 5  | 3.556            | 0.060 | 0.5132  | 9  |
| <b>NDUFS4</b>   |                    |       |    |                  |       |         |    |
| Gleason score 5 | 2.106              | 0.121 | 18 | 2.416            | 0.089 | 0.044   | 19 |
| Gleason score 6 | 2.045              | 0.103 | 22 | 2.114            | 0.140 | 0.6921  | 21 |
| Gleason score 7 | 2.221              | 0.108 | 29 | 2.572            | 0.086 | 0.0126  | 32 |
| Gleason score 8 | 2.236              | 0.197 | 11 | 2.191            | 0.169 | 0.8624  | 11 |
| Gleason score 9 | 2.538              | 0.183 | 8  | 2.920            | 0.175 | 0.1535  | 10 |
| <b>SDHA</b>     |                    |       |    |                  |       |         |    |
| Gleason score 5 | 1.850              | 0.104 | 18 | 2.247            | 0.113 | 0.0145  | 19 |
| Gleason score 6 | 1.945              | 0.091 | 22 | 2.214            | 0.099 | 0.0522  | 21 |
| Gleason score 7 | 2.039              | 0.083 | 31 | 2.597            | 0.075 | <0.0001 | 32 |
| Gleason score 8 | 2.145              | 0.142 | 11 | 2.636            | 0.173 | 0.0403  | 11 |
| Gleason score 9 | 2.244              | 0.244 | 9  | 2.470            | 0.213 | 0.4940  | 10 |
| <b>UQCRC2</b>   |                    |       |    |                  |       |         |    |
| Gleason score 5 | 2.376              | 0.069 | 17 | 2.337            | 0.099 | 0.7498  | 19 |
| Gleason score 6 | 2.410              | 0.086 | 20 | 2.521            | 0.080 | 0.3494  | 19 |
| Gleason score 7 | 2.303              | 0.080 | 30 | 2.609            | 0.045 | 0.0012  | 32 |
| Gleason score 8 | 2.509              | 0.149 | 11 | 2.330            | 0.087 | 0.3237  | 10 |
| Gleason score 9 | 2.420              | 0.077 | 10 | 2.530            | 0.080 | 0.3365  | 10 |
| <b>MT-CO1</b>   |                    |       |    |                  |       |         |    |
| Gleason score 5 | 2.438              | 0.060 | 16 | 2.363            | 0.111 | 0.5811  | 19 |
| Gleason score 6 | 2.411              | 0.085 | 19 | 2.558            | 0.080 | 0.2170  | 19 |
| Gleason score 7 | 2.282              | 0.085 | 28 | 2.606            | 0.044 | 0.0009  | 32 |
| Gleason score 8 | 2.482              | 0.146 | 11 | 2.450            | 0.100 | 0.8619  | 10 |
| Gleason score 9 | 2.370              | 0.065 | 10 | 2.450            | 0.086 | 0.4676  | 10 |
| <b>ATP5F1A</b>  |                    |       |    |                  |       |         |    |
| Gleason score 5 | 2.083              | 0.082 | 18 | 2.328            | 0.094 | 0.0578  | 18 |
| Gleason score 6 | 2.110              | 0.092 | 21 | 2.339            | 0.089 | 0.0844  | 18 |
| Gleason score 7 | 1.900              | 0.096 | 30 | 2.550            | 0.054 | <0.0001 | 32 |
| Gleason score 8 | 2.245              | 0.110 | 11 | 2.480            | 0.184 | 0.2766  | 10 |
| Gleason score 9 | 2.078              | 0.120 | 9  | 2.560            | 0.088 | 0.0044  | 10 |

The mean  $\pm$  SEM of the staining intensities, the p values and the number of the analyzed samples (n) is given.
